# Supplementary material for: Pull-push neuromodulation of cortical plasticity enables rapid bi-directional shifts in ocular dominance
Source: eLife. 2020 May 20;9:e54455. doi: 10.7554/eLife.54455 (PMC7239653; doi:10.7554/eLife.54455)
Supplement: Figure 1—figure supplement 1—source data 1. [file elife-54455-fig1-figsupp1-data1.xlsx]

## Sheet: Figure1-Supplementary figure1
Supplementary Figure 1A
Isoproterenol	Ro 60-0175	Methoxamine
0.2258	0.2565	0.2396
0.2089	0.1509	0.3097
0.2245	0.295	0.2594
0.3584	0.3336	0.2514
0.2976	0.3357	0.2392
0.3598	0.181	0.2315
0.2413
Supplementary Figure 1B
Vehicle	Isoproterenol	Ro 60-0175	Methoxamine
0.32	0.32	0.24	0.04835
0.27	0.46	0.1	0.169117
0.29	0.41	0.21	-0.02914
0.216	0.39	0.14	0.079794
0.2	0.49	0.02	0.2316
0.31	0.28	0.1
0.305	0.324	0.12
	0.319	0.21
	0.2532	0.11
		0.185
