# Supplementary material for: Pull-push neuromodulation of cortical plasticity enables rapid bi-directional shifts in ocular dominance
Source: eLife. 2020 May 20;9:e54455. doi: 10.7554/eLife.54455 (PMC7239653; doi:10.7554/eLife.54455)
Supplement: Figure 1—source data 1. [file elife-54455-fig1-data1.xlsx]

## Sheet: Figure 1
Figure 1C
	Contralateral		Ipsilateral		ODI
	b	a	b	a	b	a
mouse1	1.67	1.89	0.86	1	0.27	0.24
mouse2	3.27	1.92	1.48	1.6	0.38	0.1
mouse3	2.07	1.88	1.19	1.17	0.24	0.21
mouse4	1.41	1.51	0.9	1.02	0.2	0.14
mouse5	3.18	1.71	1.89	1.41	0.24	0.02
mouse6	1.34	0.39	0.73	0.47	0.3	0.1
mouse7	2.655	2.1	1.5684	1.31	0.2566	0.12
mouse8	3.34	3.28	1.47	2.12	0.382	0.21
mouse9	2.64	1.67	1.62	1.22	0.222	0.11
mouse10	2.205	2.05	1.161	1.388	0.312	0.185
Figure 1E
	Contralateral		Ipsilateral		ODI
	b	a	b	a	b	a
mouse1	3	2.5	1.45	1.22	0.35	0.32
mouse2	3.24	4.14	1.95	1.53	0.25	0.46
mouse3	2.476	3.229	1.488	1.348	0.241	0.41
mouse4	1.8	3.32	1.48	2.3	0.09	0.18
mouse5	3.29	4.34	1.79	2.09	0.27	0.35
mouse6	2.02	4.89	1	1.69	0.31	0.49
mouse7	3.205	3.888	1.761	2.024	0.297	0.324
mouse8	2.088	2.232	1.343	1.135	0.195	0.319
mouse9	2.7516	3.5696	1.7822	2.0968	0.2111	0.2532
Figure1G
	Contralateral		Ipsilateral		ODI
	b	a	b	a	b	a
mouse1	2.42	4.04	1.27	2.12	0.19	0.32
mouse2	1.99	2.08	1	1.13	0.29	0.27
mouse3	2.18	1.53	1.19	0.81	0.28	0.29
mouse4	3.166	4.209	1.959	2.716	0.236	0.216
mouse5	2.383	2.15	1.5	1.401	0.225	0.2
mouse6	2.955	2.767	1.454	1.469	0.327	0.31
mouse7	1.962	1.607	1.178	0.844	0.26	0.305
