# Supplementary material for: Pull-push neuromodulation of cortical plasticity enables rapid bi-directional shifts in ocular dominance
Source: eLife. 2020 May 20;9:e54455. doi: 10.7554/eLife.54455 (PMC7239653; doi:10.7554/eLife.54455)
Supplement: Figure 2—figure supplement 1—source data 1. [file elife-54455-fig2-figsupp1-data1.xlsx]

## Sheet: Figure2_Supplementary figure1
Figure2-Supplementary1C								Figure2-Supplementary1D
	P1		P2		Rn				P1		P2		Rn
Time	Mean	SE	Mean	SE	Mean	SE		Time	Mean	SE	Mean	SE	Mean	SE
-20	1.01166	0.067916	0.98992	0.0307456	103.972	5.90804		-20	1.04524	0.0848233	0.971948	0.0236819	102.877	2.31087
-19	0.968575	0.0815261	0.958204	0.0343757	100.282	1.92824		-19	0.935639	0.0335067	1.01945	0.033011	102.93	1.60836
-18	0.977205	0.039917	1.03957	0.0545757	96.9421	1.39494		-18	0.926105	0.0390111	1.02009	0.0394144	102.474	1.50825
-17	1.06802	0.0438575	0.916318	0.0678509	99.5798	0.624691		-17	1.01692	0.0350642	0.967378	0.0600497	100.971	1.5462
-16	0.915437	0.0548096	0.885566	0.0265131	100.289	1.62947		-16	1.00207	0.0462574	0.940275	0.0295037	99.1234	0.743486
-15	1.07632	0.0660178	1.0413	0.0215678	100.72	0.769532		-15	0.980342	0.0465887	1.03358	0.0574592	98.5427	1.09624
-14	0.953863	0.0401453	0.947293	0.058071	98.9013	1.64095		-14	0.923704	0.0494596	1.00925	0.0548219	97.9624	1.59091
-13	1.06252	0.0753903	1.10326	0.00733572	103.538	1.72283		-13	1.03247	0.0406032	1.02294	0.0459984	99.4205	1.84452
-12	1.08035	0.0565919	1.1005	0.00830005	98.6739	2.57149		-12	1.00381	0.0475964	1.01046	0.0443404	98.3003	2.07677
-11	0.886039	0.0708608	1.01807	0.0558608	97.1021	3.60538		-11	1.00973	0.0790125	1.02797	0.042383	97.3975	1.69413
-10	1.04573	0.0763668	1.1287	0.0593226	105.599	2.84819		-10	1.11195	0.0812169	1.04248	0.0392538	96.909	1.92922
-9	1.06568	0.0542037	0.999028	0.0432825	106.342	2.95149		-9	1.06299	0.0551981	1.09514	0.0669914	96.0758	2.00241
-8	1.0382	0.0454226	0.910978	0.0321268	108.276	2.54577		-8	1.23209	0.0869453	1.05149	0.0687233	96.2128	2.027
-7	0.901053	0.0736471	0.926975	0.0729985	107.179	3.93021		-7	1.07659	0.0642257	1.18291	0.0654817	95.7714	2.37785
-6	0.874846	0.0646165	0.856202	0.0782266	106.453	5.18378		-6	1.19926	0.0816658	1.12996	0.066554	94.664	2.26123
-5	0.89306	0.0901608	0.98288	0.0736923	104.118	4.26344		-5	1.26716	0.0600788	1.1453	0.0532064	93.7967	2.41766
-4	0.856726	0.0882581	0.904684	0.0750895	101.781	3.39411		-4	1.18183	0.0939319	1.19427	0.0632035	92.5625	1.84179
-3	0.980829	0.0761627	0.900183	0.0962408	105.956	6.51754		-3	1.26258	0.0853122	1.19117	0.0707791	92.9084	2.50681
-2	0.762579	0.0604888	0.875739	0.0623024	104.658	4.78721		-2	1.19705	0.0908938	1.18604	0.0795414	92.5722	1.89975
-1	0.818353	0.0378146	0.958812	0.0879558	106.415	5.84524		-1	1.27534	0.0492362	1.11395	0.0517348	94.0263	2.93825
1	0.579954	0.0450364	0.999306	0.190177	97.7678	11.4122		1	1.18529	0.0822004	1.09062	0.0837937	90.539	3.08442
2	0.728891	0.0846239	0.913797	0.123179	102.777	11.0852		2	1.34611	0.0452896	1.11546	0.0877749	93.067	2.35958
3	0.658709	0.047833	0.900478	0.0881203	101.685	7.43525		3	1.44038	0.0827925	1.13027	0.104234	93.7708	2.19886
4	0.729109	0.0398752	0.998768	0.0632512	104.067	8.09045		4	1.29088	0.0869986	1.27428	0.0848357	95.3096	1.97455
5	0.765684	0.043266	0.95746	0.112917	102.816	4.73774		5	1.34835	0.0911469	1.27803	0.0744499	96.0594	1.9588
6	0.649217	0.0527001	1.02018	0.0679338	106.634	6.4836		6	1.39691	0.0707784	1.22343	0.0923897	96.0893	2.38502
7	0.626912	0.0684841	0.921153	0.0837784	108.422	6.86262		7	1.30179	0.056632	1.15148	0.0811044	98.061	2.00038
8	0.610831	0.0741404	0.931105	0.0926371	103.718	3.9605		8	1.30407	0.0756652	1.22559	0.0701065	99.6234	2.34103
9	0.691732	0.0695993	0.987574	0.105816	108.655	6.25144		9	1.15689	0.0932177	1.15352	0.0699888	99.053	3.21296
10	0.603399	0.0965516	0.916994	0.0927823	104.102	4.13856		10	1.19177	0.0722712	1.21361	0.0661155	100.993	2.93468
11	0.746272	0.116776	0.894699	0.0481454	106.291	5.27469		11	1.23232	0.0908689	1.23566	0.0943418	101.398	2.69226
12	0.838394	0.11521	0.861285	0.0746644	108.3	5.81029		12	1.36585	0.0604412	1.24659	0.0847166	100.545	2.6406
13	0.728169	0.100852	0.833004	0.024767	106.823	4.67926		13	1.16904	0.0847062	1.18322	0.0862718	101.663	2.71048
14	0.685399	0.0947597	0.860166	0.0872377	107.471	5.91874		14	1.27073	0.0761023	1.23568	0.112901	102.625	3.14858
15	0.636363	0.0580133	0.968946	0.0689136	109.512	5.90968		15	1.13853	0.0477362	1.2305	0.129212	102.159	3.89987
16	0.76636	0.0744289	0.889747	0.107958	106.879	5.28549		16	1.31435	0.102074	1.33396	0.0817888	101.529	4.00444
17	0.71714	0.0596657	0.834048	0.0541195	105.555	6.02838		17	1.22707	0.0658506	1.24364	0.0665765	102.802	4.44045
18	0.740551	0.0680029	0.92938	0.0568185	109.709	7.08836		18	1.30097	0.0617732	1.20899	0.0904147	102.134	4.90181
19	0.674814	0.0425844	0.852087	0.0375323	108.159	6.18197		19	1.28806	0.0597653	1.27223	0.0635426	102.161	5.32393
20	0.7273	0.0973519	0.73685	0.074106	109.968	5.85588		20	1.37908	0.0653741	1.27237	0.0763691	102.868	5.38698
21	0.775951	0.104717	0.874379	0.0557928	105.694	6.50397		21	1.25348	0.0670585	1.16484	0.0774247	102.254	4.9339
22	0.708158	0.0795964	0.846637	0.0611441	109.656	7.94156		22	1.13888	0.0668178	1.27897	0.0561893	102.951	6.11295
23	0.706473	0.0628337	0.914184	0.0789261	108.482	6.50207		23	1.31478	0.0477511	1.25912	0.105093	102.871	6.55745
24	0.658707	0.0551218	0.896182	0.0840445	111.052	7.86084		24	1.19345	0.068022	1.20528	0.0858375	103.542	6.97995
25	0.650393	0.0623067	0.836679	0.0604698	109.215	5.87217		25	1.22102	0.0517891	1.24898	0.0736883	102.214	7.27469
26	0.673681	0.0824836	0.868296	0.0740326	109.097	7.19813		26	1.23861	0.0684085	1.22965	0.0882801	102.982	7.37905
27	0.648318	0.0657073	0.870525	0.0919202	105.338	5.07781		27	1.21812	0.0869143	1.18271	0.0466005	103.998	7.61064
28	0.601431	0.0900988	0.906309	0.0705707	107.114	6.40991		28	1.29003	0.0758155	1.18269	0.0585187	103.906	7.79584
29	0.574321	0.0623306	0.886724	0.0908753	109.767	7.93162		29	1.23339	0.0591186	1.23628	0.0753906	103.641	8.44021
30	0.65485	0.0913822	0.809829	0.0797797	108.008	6.0369		30	1.1935	0.0577918	1.23375	0.0618174	103.572	8.87474
