# Supplementary material for: Pull-push neuromodulation of cortical plasticity enables rapid bi-directional shifts in ocular dominance
Source: eLife. 2020 May 20;9:e54455. doi: 10.7554/eLife.54455 (PMC7239653; doi:10.7554/eLife.54455)
Supplement: Figure 2—source data 1. [file elife-54455-fig2-data1.xlsx]

## Sheet: Figure 2
Figure 2C
	Contralateral		Ipsilateral		ODI
	b	a	b	a	b	a
mouse1	1.60729	1.12491	1.00392	1.09252	0.244301	0.0288089
mouse2	2.5497	1.5273	1.60381	1.13939	0.214111	0.152288
mouse3	3.93728	2.21852	2.38644	2.20298	0.22487	0.00765069
mouse4	3.74486	2.03029	2.36189	2.05874	0.224613	-0.0261086
mouse5	3.02647	2.07881	1.91353	1.90711	0.19183	0.0343979
mouse6	2.97312	1.79597	1.85392	1.68015	0.219945	0.0394074
Figure 2E
	Contralateral		Ipsilateral		ODI
	b	a	b	a	b	a
mouse1	3.02	2.5	2.03	1.86	0.197	0.142
mouse2	3.03	3.36	1.7	2.14	0.289	0.228
mouse3	4.35	4.01	1.92	1.75	0.396	0.382
mouse4	2.83	3.49	1.58	1.56	0.285	0.366
mouse5	3.9	4.8	2.8	2.6	0.154	0.288
mouse6	3.04	3.8	1.83	2	0.207	0.31
mouse7	1.67	1.97	1.14	0.95	0.156	0.335
mouse8	3.63	5.79	1.88	2.53	0.313	0.398
mouse9	2.49	3.44	1.67	1.67	0.186	0.347
mouse10	1.87	1.6	1.26	0.97	0.177	0.245
mouse11	1.96	2.79	1.21	1.81	0.231	0.29
