# Supplementary material for: Pull-push neuromodulation of cortical plasticity enables rapid bi-directional shifts in ocular dominance
Source: eLife. 2020 May 20;9:e54455. doi: 10.7554/eLife.54455 (PMC7239653; doi:10.7554/eLife.54455)
Supplement: Figure 3—source data 1. [file elife-54455-fig3-data1.xlsx]

## Sheet: Figure 3
														Trace inset
							Figure 3C			Figure 3D				Figure 3C		Figure 3D		Figure 3E		Figure 3F
Figure 3B	L23		L4				ND	MD		ND	MD			ND	MD	ND	MD	NC	C	NC	C
	Trace1	Trace2	Trace1	Trace2			15.5262	14.299		17.3564	15.1642			-0.766265	-0.235562	-1.1406	-0.575496	-2.42601	-2.00756	-1.86407	-1.53892
0.1	-0.444297	4.67772	0.092782	-1.10355			16.4404	12.8226		20.6393	11.3			-0.757923	-0.443962	-1.09683	-0.368189	-2.30317	-1.82474	-1.76895	-1.50662
0.2	-1.9092	1.74802	-2.34862	-0.126951			20.7298	19.9838		15.9914	13.7399			-0.515756	-0.667697	-1.06144	-0.33186	-2.16956	-1.7373	-1.76289	-1.58975
0.3	-0.932597	1.74802	-1.37212	-1.59175			15.2826	12.5012		12.6583	10.2074			-0.499401	-0.742935	-1.07385	-0.413503	-2.15315	-1.8806	-1.85028	-1.69071
0.4	0.043903	2.72462	0.092782	-2.08005			13.9464	12.6494		17.8891	13.3228			-0.3998	-0.410016	-0.664668	-0.455655	-2.18169	-1.94373	-1.91492	-1.73326
0.5	1.0205	3.21292	0.581082	-2.56835			17.2485	16.2349		13.6331	14.8832			-0.899371	-0.192657	-0.675403	-0.375414	-2.2345	-1.88375	-1.90277	-1.67538
0.6	1.5088	1.74802	2.53418	-3.05665			13.9191	12.7373		11.5989	9.52574			-0.466393	-0.425808	-0.456132	-0.272598	-2.1637	-1.68146	-1.79132	-1.55821
0.7	0.532203	2.23632	1.55758	-1.10355			12.9416	10.2041		14.9502	12.0912			-0.144101	-0.60338	-0.504399	-0.52741	-2.07841	-1.78723	-1.78192	-1.44974
0.8	1.9971	2.23632	1.55758	-1.10355			15.4835	14.6616		15.1899				-0.216574	-0.348852	-0.838468	-0.60977	-2.07592	-1.85895	-1.7833	-1.40704
0.9	1.9971	1.74802	0.581082	-1.10355			17.0257	9.4174						-0.270499	-0.372591	-0.390597	-0.469275	-2.12207	-2.04518	-1.88904	-1.48447
1	1.5088	1.74802	1.06938	-1.10355				10.29						-0.489682	-0.337815	-0.386196	-0.570437	-2.082	-1.93303	-1.88137	-1.47476
1.1	-0.932597	3.70122	2.53418	-4.03315				12.2737						-0.444446	-0.277888	-0.628213	-0.263914	-1.97848	-1.90308	-1.89088	-1.5084
1.2	-0.444297	2.72462	1.06938	-3.05665										-0.370807	-0.373068	-0.750107	0.0150825	-1.90106	-1.73184	-1.9011	-1.53344
1.3	0.043903	3.70122	-0.395518	-2.56835										-0.497906	0.126682	-0.792896	0.023877	-1.94462	-1.69928	-1.9196	-1.68398
1.4	1.0205	3.70122	1.06938	-2.56835			Figure 3E			Figure 3F				-0.655882	0.0185223	-1.14237	-0.300926	-1.94064	-1.52064	-1.93053	-1.81032
1.5	1.0205	2.72462	1.06938	-2.08005			NC	C		NC	C			-0.745317	-0.190409	-0.445308	-0.567341	-1.89929	-1.50471	-2.00438	-1.82963
1.6	-1.4209	2.23632	-0.883818	-1.10355			25.3722	21.8111		10.7778	8.8443			-0.581024	-0.420916	-0.505559	-0.628043	-1.86178	-1.48912	-2.06287	-1.77007
1.7	-0.444297	2.23632	-0.395518	-0.615251			14.1624	14.99		28.2767	18.5654			-0.313014	-0.518626	-0.792044	-0.536858	-1.90415	-1.67448	-2.07808	-1.68876
1.8	0.532203	1.74802	0.581082	-2.56835			21.5987	13.1261		18.2132	16.4676			-0.363903	-0.301215	-0.771402	-0.166935	-1.88686	-1.6306	-1.99408	-1.63338
1.9	0.043903	2.72462	1.06938	-3.54495			17.6447	8.63074		15.2783	9.68949			-0.394979	-0.0799622	-0.781239	-0.437691	-1.88912	-1.58747	-1.91598	-1.60845
2	-0.932597	3.21292	1.55758	-1.10355			17.0615	15.2664		12.4956	15.5932			-0.498322	-0.468637	-0.642685	-0.34242	-1.853	-1.38273	-1.85447	-1.68215
2.1	-0.444297	3.21292	0.581082	-1.10355			18.7868	13.6821		13.6467	17.7421			-0.584996	-0.656865	-0.394564	-0.0848914	-1.89214	-1.52698	-1.82881	-1.76833
2.2	-0.444297	3.21292	1.06938	-2.56835			23.6091	13.6175		22.3115	14.8844			-0.60791	-0.701717	-0.302834	-0.105898	-1.86043	-1.52717	-1.80786	-1.77438
2.3	-0.444297	3.70122	0.092782	-2.56835			20.5842	12.119		12.7545	11.0932			-0.283723	-0.518201	-0.491902	-0.122701	-1.78246	-1.51301	-1.74399	-1.68428
2.4	-0.932597	1.25972	-1.37212	-1.59175				12.843		20.042	20.197			-0.247794	-0.198259	-0.482563	-0.193072	-1.69018	-1.29083	-1.585	-1.56378
2.5	-0.444297	2.72462	1.55758	-1.59175				16.1951		16.0537	17.6945			-0.35092	-0.301417	-0.0174263	-0.188	-1.64865	-1.17313	-1.44041	-1.62139
2.6	1.0205	2.23632	3.02248	-0.615251				14.1073		14.697	15.4508			-0.366016	-0.34524	-0.09923	-0.0231329	-1.66011	-1.31895	-1.39968	-1.67088
2.7	1.0205	2.23632	1.06938	-1.10355						13.1014				-0.479519	-0.228687	-0.220793	-0.0558313	-1.74582	-1.48595	-1.50052	-1.72834
2.8	1.9971	2.23632	0.092782	-1.59175										-0.377856	-0.161879	-0.219305	-0.0563996	-1.74754	-1.47853	-1.56805	-1.57791
2.9	0.532203	0.771521	0.581082	-1.59175										-0.111399	-0.273401	-0.365622	0.00276992	-1.65451	-1.2643	-1.49222	-1.3099
3	0.532203	1.25972	0.092782	-3.05665										-0.151331	-0.387554	-0.490649	-0.221465	-1.54201	-1.05927	-1.36827	-1.09406
3.1	0.043903	1.74802	1.06938	-2.56835										-0.418611	-0.339933	0.185975	-0.322634	-1.4184	-1.12125	-1.25434	-1.05237
3.2	0.043903	2.72462	0.581082	-2.56835										-0.147189	0.0119723	0.00675245	-0.120816	-1.42731	-1.32224	-1.25349	-1.14391
3.3	0.532203	2.23632	-0.883818	-2.56835										-0.0713196	-0.166019	-0.143177	-0.00920117	-1.455	-1.4327	-1.24259	-1.17763
3.4	1.5088	2.23632	0.092782	-0.126951										-0.221605	-0.228645	-0.0142937	-0.116419	-1.47203	-1.41444	-1.18157	-1.17679
3.5	-0.444297	3.21292	0.092782	-0.615251										0.0598145	-0.0498189	0.222275	-0.0612446	-1.37269	-1.27803	-1.08062	-1.1056
3.6	0.532203	1.25972	-0.883818	-2.08005										-0.0583888	-0.116688	0.059269	-0.00437539	-1.25091	-1.00542	-0.953411	-1.02344
3.7	0.043903	0.771521	-0.395518	-2.08005										-0.0117752	-0.0288278	-0.0450385	0.0314666	-1.2468	-0.844489	-0.829275	-0.96059
3.8	-1.4209	-1.66988	-0.395518	-3.05665										0.0610553	-0.00576854	0.607185	0.31661	-1.40698	-0.791643	-0.773502	-1.04779
3.9	-1.4209	-0.693379	-0.395518	-4.52145										0.130283	0.195456	0.61307	0.306591	-1.52475	-0.930363	-0.767672	-1.08701
4	-0.932597	0.771521	0.092782	-2.08005										0.264935	0.125039	0.181598	0.380359	-1.43612	-0.788721	-0.822295	-1.00377
4.1	-0.932597	0.283221	-1.37212	0.361349										0.322791	-0.121886	-0.0275053	0.12795	-1.18315	-0.564011	-0.749192	-0.80946
4.2	0.043903	-1.66988	0.092782	-0.615251										0.309541	-0.371322	0.261134	-0.362777	-0.931939	-0.386666	-0.701816	-0.727499
4.3	0.532203	-2.64648	0.581082	-0.615251										0.0745004	-0.105307	0.443534	-0.213938	-0.793552	-0.432558	-0.684426	-0.783807
4.4	1.0205	-4.11138	1.06938	-1.10355										-0.185529	0.0737174	0.451079	0.0610256	-0.729188	-0.436071	-0.721592	-0.872738
4.5	1.0205	-3.13478	0.581082	-1.10355										-0.244396	-0.187269	-0.0530481	0.194625	-0.676208	-0.505615	-0.705858	-0.901196
4.6	0.532203	-2.64648	0.092782	-0.126951										0.057606	-0.113728	-0.0281959	0.0627905	-0.599789	-0.430326	-0.612236	-0.782015
4.7	-0.444297	-1.66988	-0.395518	1.82615										0.0867146	0.074056	0.259081	0.029072	-0.530466	-0.270071	-0.482624	-0.595295
4.8	-0.444297	-2.15818	-0.883818	-0.126951										0.317578	0.147466	0.789284	-0.089229	-0.47645	-0.058861	-0.3018	-0.426643
4.9	-0.932597	-3.62308	0.092782	-0.615251										0.346257	0.0174779	0.750759	0.235884	-0.433497	0.0470011	-0.24341	-0.339624
5	-0.932597	-2.64648	-0.883818	0.361349										0.277079	0.00334758	0.602514	0.115401	-0.363194	-0.0401329	-0.319548	-0.412613
5.1	0.532203	-1.66988	-0.883818	0.849649										0.032767	-0.00684176	0.632993	-0.23392	-0.3031	0.052593	-0.304022	-0.426474
5.2	0.532203	-2.64648	-0.395518	-0.126951										0.111842	0.0128156	0.381875	-0.0102293	-0.176511	0.108907	-0.176715	-0.338155
5.3	1.0205	-4.59958	0.581082	-0.126951										0.375687	0.215475	0.560763	0.204872	0.0415619	0.193297	-0.0032313	-0.112312
5.4	0.043903	-3.62308	0.092782	0.361349										0.315312	-0.0284467	0.537511	0.489426	0.218342	0.214919	-0.0136296	-0.0507271
5.5	-0.444297	-2.15818	0.092782	-0.126951										0.401778	-0.104089	0.521715	0.333516	0.155739	0.157856	-0.0283473	-0.113727
5.6	-1.9092	-2.64648	0.092782	-0.615251										0.856806	0.137228	0.620186	0.448895	0.0382029	0.157436	-0.00582456	-0.26183
5.7	-0.444297	-3.62308	0.092782	-0.126951										1.07723	0.166149	0.699265	0.300714	0.261334	0.406695	0.173678	-0.0817065
5.8	1.0205	-3.62308	0.581082	-0.615251										1.06328	0.343853	0.829449	0.296748	0.844454	0.929527	0.595837	0.541067
5.9	-0.932597	-2.64648	0.092782	0.849649										1.27388	0.879046	1.29089	1.04293	1.0074	1.08427	0.815674	0.935964
6	-0.932597	-2.64648	-0.395518	-0.615251										1.09143	0.656954	1.75163	0.948492	0.21041	0.287246	0.204006	0.302698
6.1	0.532203	-3.13478	-1.37212	0.849649										-2.38404	-1.77281	-2.55292	-1.98248	-1.65684	-1.55254	-1.61904	-1.81364
6.2	0.532203	-3.13478	-0.883818	2.80275										-4.81786	-3.31693	-4.36045	-3.50993	-3.87502	-3.45968	-3.77844	-4.30814
6.3	0.043903	-3.62308	-0.395518	2.80275										-6.53965	-4.41668	-5.31585	-4.52824	-5.99402	-5.02385	-5.56836	-6.36034
6.4	1.5088	-1.18168	0.581082	2.31445										-7.87344	-5.73994	-6.50494	-4.98182	-7.76626	-6.01065	-6.82861	-7.64039
6.5	1.0205	-1.18168	0.092782	1.82615										-9.31607	-6.62234	-7.31482	-5.9971	-9.29345	-6.90603	-7.85499	-8.57764
6.6	-0.444297	-0.205079	-0.395518	0.849649										-10.757	-7.43269	-8.07768	-6.94475	-10.5748	-7.71229	-8.91632	-9.47385
6.7	0.532203	-1.66988	1.06938	1.82615										-11.4047	-8.17586	-8.62525	-7.58811	-11.4834	-8.47802	-9.88094	-10.2619
6.8	0.043903	-1.18168	-0.395518	1.33785										-11.4691	-8.41249	-9.06626	-7.82128	-12.0813	-9.12631	-10.6597	-10.7319
6.9	1.5088	-1.18168	-1.37212	1.33785										-11.6375	-8.44564	-9.31236	-8.27134	-12.5071	-9.70625	-11.1726	-10.866
7	0.043903	-1.66988	-0.883818	2.80275										-12.0693	-8.42369	-9.97361	-8.48319	-12.8564	-10.101	-11.465	-10.8884
7.1	-0.932597	-0.693379	1.06938	1.33785										-12.3444	-8.45481	-10.3745	-8.93784	-13.2355	-10.4022	-11.6088	-10.9916
7.2	0.043903	0.283221	-0.395518	-0.615251										-11.9691	-8.69248	-10.7774	-9.18205	-13.5792	-10.6711	-11.7489	-11.1531
7.3	0.043903	0.771521	-1.37212	-1.10355										-11.895	-8.69075	-11.1696	-9.29194	-13.8366	-10.9401	-11.9164	-11.2194
7.4	-0.444297	-0.205079	-0.883818	-0.615251										-11.9553	-8.62381	-11.5759	-9.6147	-13.8939	-11.0559	-12.1642	-11.1874
7.5	-0.444297	0.283221	-0.883818	1.33785										-11.946	-8.72814	-12.0408	-9.96817	-13.89	-10.9306	-12.2336	-11.0985
7.6	1.0205	-1.18168	-0.883818	0.849649										-11.7301	-8.91872	-12.1441	-9.72328	-13.8229	-10.7549	-12.0749	-10.9311
7.7	1.0205	-1.66988	-0.883818	0.849649										-11.254	-8.84869	-12.2121	-9.6549	-13.6556	-10.6751	-11.9223	-10.8516
7.8	-0.932597	-0.205079	-0.395518	0.849649										-10.9222	-8.97937	-12.4062	-9.62682	-13.5236	-10.7477	-11.8276	-10.8512
7.9	0.043903	-1.18168	1.06938	2.31445										-10.6848	-8.67013	-12.4139	-9.52614	-13.3358	-10.8892	-11.856	-10.9711
8	-0.932597	-1.66988	0.092782	3.77925										-10.7106	-8.43047	-12.5132	-9.49663	-13.0251	-10.8958	-11.783	-11.0637
8.1	0.043903	-0.693379	-0.395518	3.77925										-10.5825	-8.79495	-12.5293	-9.54005	-12.6632	-10.7711	-11.6031	-10.8949
8.2	-0.932597	-0.205079	0.581082	2.80275										-10.2451	-9.00908	-12.3204	-9.34485	-12.3752	-10.4159	-11.3006	-10.5379
8.3	-1.9092	-0.205079	-1.37212	1.82615										-10.0199	-8.98591	-12.2026	-9.30453	-12.2546	-10.093	-11.0505	-10.1648
8.4	0.532203	1.25972	-0.883818	1.82615										-9.82867	-8.94678	-11.6225	-9.34952	-12.0964	-9.92351	-10.776	-9.91941
8.5	-0.444297	0.283221	-1.37212	1.82615										-9.64676	-8.77017	-11.9695	-8.78372	-11.8414	-9.89058	-10.5426	-9.7274
8.6	-0.932597	-0.205079	-1.86032	2.80275										-9.58634	-8.41802	-11.9531	-8.5497	-11.5193	-9.84667	-10.2111	-9.49947
8.7	0.043903	0.771521	-0.883818	1.33785										-9.30466	-8.33632	-11.728	-8.28335	-11.2025	-9.61458	-9.86307	-9.271
8.8	-1.4209	1.25972	-0.883818	0.849649										-9.28708	-8.18523	-11.1341	-7.80029	-10.9221	-9.29876	-9.57592	-8.99733
8.9	-1.4209	0.771521	-1.37212	1.82615										-9.04647	-7.98017	-11.0791	-7.50898	-10.6641	-9.04581	-9.33031	-8.70828
9	-0.444297	1.25972	-0.883818	2.80275										-8.81458	-7.75209	-11.0577	-7.61979	-10.4923	-8.77903	-9.16453	-8.50601
9.1	-0.932597	1.25972	-1.86032	2.80275										-8.50982	-7.58173	-10.5971	-7.29046	-10.2874	-8.53475	-8.91254	-8.36845
9.2	-0.444297	0.283221	-1.86032	3.29105										-7.9474	-7.12761	-10.2235	-7.22842	-9.98166	-8.24647	-8.61644	-8.11581
9.3	1.0205	-1.66988	-0.883818	4.26755										-7.84626	-6.9385	-10.1347	-6.90189	-9.58162	-7.97265	-8.2706	-7.63862
9.4	0.532203	-1.66988	0.092782	3.29105										-7.30903	-6.94917	-9.77155	-6.26203	-9.10735	-7.64534	-8.0402	-7.28997
9.5	0.532203	-1.18168	1.06938	2.80275										-7.56383	-6.72695	-9.06917	-6.11345	-8.77718	-7.35825	-7.83732	-7.13314
9.6	1.0205	-1.18168	1.55758	3.29105										-7.1265	-6.47855	-8.98263	-6.06661	-8.51194	-7.16209	-7.68161	-7.12497
9.7	-0.932597	0.283221	1.55758	3.29105										-6.57204	-6.46848	-8.88562	-5.8206	-8.29432	-7.05257	-7.47265	-7.02099
9.8	-0.932597	-3.13478	-0.395518	2.31445										-6.42574	-6.25879	-8.28402	-5.6318	-7.93269	-6.9208	-7.23462	-6.73882
9.9	0.043903	-4.11138	0.581082	2.80275										-6.5072	-5.98918	-7.90119	-5.23186	-7.52327	-6.59321	-6.93452	-6.43545
10	0.532203	-3.62308	0.581082	2.31445										-6.33351	-5.88117	-8.11851	-5.23376	-7.12577	-6.3606	-6.65406	-6.17326
10.1	0.532203	-3.13478	2.04588	1.82615										-6.02603	-5.79493	-7.82398	-5.26075	-6.93906	-6.19777	-6.4068	-6.03204
10.2	0.043903	-4.59958	1.06938	3.29105										-5.55118	-5.41393	-7.59893	-4.87821	-6.81613	-6.17189	-6.28354	-5.96009
10.3	-0.444297	-3.62308	0.092782	2.80275										-5.42025	-5.13712	-7.5617	-4.76847	-6.73552	-6.04895	-6.16644	-5.87731
10.4	-0.444297	-4.11138	-1.37212	1.33785										-5.64195	-4.95645	-7.71051	-5.11137	-6.53636	-5.82454	-6.00163	-5.79003
10.5	0.532203	-6.06448	-1.86032	2.31445										-5.47076	-4.9265	-7.20268	-5.1355	-6.30432	-5.57958	-5.71309	-5.64791
10.6	-0.932597	-5.57618	0.092782	4.26755										-5.06338	-5.03927	-6.73434	-4.86753	-5.98907	-5.48222	-5.51721	-5.48734
10.7	0.532203	-5.57618	0.581082	2.80275										-5.19559	-4.89162	-6.46626	-4.54793	-5.81317	-5.43686	-5.42513	-5.34725
10.8	0.532203	-7.52928	-0.883818	2.80275										-5.10222	-4.67959	-6.64185	-4.3948	-5.62355	-5.32616	-5.39836	-5.22683
10.9	0.043903	-8.01758	-1.37212	2.31445										-4.77949	-4.45601	-6.60301	-3.65772	-5.38457	-4.97732	-5.21652	-5.04643
11	0.043903	-8.50588	-1.37212	4.75585										-4.68444	-4.47966	-6.22563	-3.49646	-5.09365	-4.62825	-5.03351	-4.88694
11.1	0.043903	-8.50588	0.581082	4.75585										-4.15483	-4.22072	-5.66627	-3.78672	-4.88482	-4.49537	-4.89216	-4.77507
11.2	1.5088	-8.01758	1.06938	2.80275										-3.84888	-3.956	-5.61002	-3.81878	-4.85911	-4.42182	-4.80077	-4.72955
11.3	1.0205	-7.04098	0.581082	3.77925										-3.87635	-3.93442	-5.38703	-3.75393	-4.89417	-4.35569	-4.79229	-4.68551
11.4	0.532203	-6.55278	-0.395518	3.77925										-3.5689	-3.50378	-5.34818	-3.55356	-4.87107	-4.26595	-4.75467	-4.60049
11.5	-0.444297	-7.04098	-1.86032	3.77925										-3.63819	-3.76203	-5.56989	-3.44956	-4.74489	-4.29703	-4.71516	-4.56154
11.6	1.5088	-7.04098	-0.395518	4.26755										-3.87864	-3.82361	-5.43774	-3.30877	-4.54185	-4.18201	-4.61666	-4.45509
11.7	1.0205	-7.52928	0.581082	3.77925										-3.41983	-3.61096	-4.8982	-3.27089	-4.32521	-3.96707	-4.50917	-4.2672
11.8	0.532203	-8.01758	-0.883818	2.80275										-2.89217	-3.2404	-4.36327	-3.23871	-4.13287	-3.69567	-4.37749	-4.01675
11.9	-0.444297	-8.50588	-0.883818	3.29105										-2.74369	-2.94973	-4.12318	-3.34199	-4.10224	-3.65067	-4.25656	-3.94966
12	0.532203	-8.01758	-1.37212	1.82615										-2.9801	-2.98938	-4.21702	-2.93607	-4.07028	-3.61725	-4.12035	-3.95064
12.1	-1.4209	-8.99418	0.092782	3.29105										-2.87218	-3.07192	-4.58708	-2.69712	-3.88345	-3.61942	-4.0268	-3.92687
12.2	0.043903	-8.01758	2.04588	4.75585										-3.34229	-2.98377	-4.81851	-2.62219	-3.67919	-3.33894	-3.85677	-3.83853
12.3	0.043903	-6.55278	1.06938	5.73245										-3.05499	-2.63298	-3.92611	-2.56814	-3.6304	-3.1811	-3.75279	-3.75309
12.4	-0.932597	-6.55278	-0.395518	5.24415										-2.69472	-2.03286	-3.13239	-2.5739	-3.66094	-3.05896	-3.71446	-3.6918
12.5	0.043903	-9.97068	-0.883818	4.75585										-2.60508	-2.48848	-2.82222	-2.33983	-3.57444	-3.16475	-3.78422	-3.59042
12.6	0.532203	-7.04098	0.092782	3.77925										-2.21951	-2.30618	-2.22327	-1.84724	-3.36347	-3.17838	-3.81325	-3.51973
12.7	0.043903	-5.08788	0.092782	3.29105										-2.02724	-2.30131	-2.86254	-1.74557	-3.25127	-3.11117	-3.76292	-3.49439
12.8	-0.932597	-4.59958	-0.883818	5.24415										-1.9776	-2.44303	-2.90889	-1.83371	-3.17018	-3.06788	-3.52476	-3.43163
12.9	-0.932597	-7.52928	0.092782	5.73245										-2.00679	-2.20426	-2.71357	-2.11579	-3.04362	-3.02884	-3.30474	-3.2995
13	0.532203	-7.52928	1.55758	4.26755										-2.08877	-2.0103	-2.70393	-2.05227	-2.95646	-3.00387	-3.132	-3.22099
13.1	1.9971	-8.01758	0.092782	3.77925										-1.74192	-2.02486	-2.59871	-1.66616	-2.92291	-2.88623	-3.10952	-3.2121
13.2	-0.444297	-8.99418	-1.86032	4.26755										-1.7317	-1.91903	-2.91076	-1.75897	-2.89492	-2.75992	-3.04263	-3.30986
13.3	1.5088	-6.55278	-1.86032	3.29105										-1.86443	-1.87579	-2.6714	-1.87488	-2.80454	-2.64183	-2.91444	-3.28058
13.4	0.532203	-4.11138	0.092782	2.31445										-1.93067	-2.05015	-2.32643	-1.94919	-2.70618	-2.5705	-2.78302	-3.17833
13.5	0.043903	-5.08788	1.55758	1.33785										-2.15271	-1.7077	-2.34575	-1.79852	-2.73051	-2.57282	-2.7156	-2.96698
13.6	0.043903	-7.04098	0.092782	3.77925										-0.968826	-1.87852	-2.34825	-1.72085	-2.77224	-2.63655	-2.74211	-2.84411
13.7	1.0205	-6.55278	-1.37212	6.22075										-1.29371	-1.93581	-2.45118	-1.50955	-2.78332	-2.71021	-2.8432	-2.80394
13.8	0.043903	-8.01758	-0.395518	6.22075										-1.2499	-2.07812	-2.73157	-1.41699	-2.58735	-2.63023	-2.90455	-2.76161
13.9	0.532203	-6.55278	0.092782	4.26755										-1.25591	-1.7998	-2.4255	-1.46612	-2.31088	-2.57384	-2.90458	-2.67701
14	0.043903	-5.57618	-0.395518	3.77925										-1.58202	-1.79699	-1.79555	-1.83407	-2.2107	-2.47415	-2.69766	-2.46582
14.1	0.532203	-5.57618	0.092782	5.24415										-1.15671	-1.52284	-1.56237	-1.04169	-2.28802	-2.50471	-2.50678	-2.43209
14.2	0.532203	-6.55278	-0.883818	4.75585										-1.14477	-1.77331	-1.70401	-1.03439	-2.48145	-2.4745	-2.34917	-2.44181
14.3	1.0205	-5.08788	-1.37212	4.75585										-1.33602	-1.65688	-1.85573	-1.44234	-2.51954	-2.46894	-2.32447	-2.47884
14.4	1.0205	-6.55278	-0.395518	4.26755										-1.40758	-1.58913	-1.94345	-1.38315	-2.31688	-2.49482	-2.38811	-2.38243
14.5	1.5088	-7.04098	1.06938	3.77925										-0.428063	-1.54838	-1.70459	-1.0166	-2.00731	-2.43879	-2.41415	-2.20533
14.6	0.043903	-4.11138	1.06938	3.77925										-0.751201	-1.20704	-1.53389	-0.795888	-1.82265	-2.47164	-2.37897	-2.01912
14.7	0.532203	-6.55278	-0.395518	5.24415										-1.025	-1.49749	-1.51834	-0.948531	-1.80423	-2.42032	-2.31804	-1.92202
14.8	1.0205	-5.08788	-1.37212	5.24415										-0.973716	-1.3479	-1.57723	-1.04449	-1.86325	-2.44676	-2.34425	-1.87485
14.9	1.5088	-4.11138	-1.86032	3.77925										-0.93952	-1.48474	-1.52031	-0.868344	-1.85953	-2.43543	-2.41982	-1.86821
15	1.9971	-5.08788	0.092782	4.75585										-0.860627	-1.45326	-1.52682	-0.795793	-1.82562	-2.55724	-2.42447	-1.81764
15.1	0.532203	-5.57618	0.092782	6.70895										-0.897893	-1.32176	-1.33557	-0.598842	-1.77699	-2.58861	-2.33404	-1.80795
15.2	0.043903	-3.62308	-0.395518	5.73245										-1.14394	-1.49433	-1.18118	-0.958099	-1.75999	-2.56592	-2.25511	-1.82013
15.3	-0.932597	-4.11138	0.092782	4.75585										-1.13491	-1.6791	-1.27117	-1.15842	-1.80255	-2.41135	-2.18166	-1.80551
15.4	1.0205	-4.59958	-0.395518	4.26755										-0.948387	-1.54735	-1.40236	-1.03571	-1.81598	-2.30121	-2.16669	-1.68298
15.5	0.043903	-5.57618	-0.395518	3.77925										-0.726176	-1.3283	-1.14325	-0.632004	-1.78933	-2.28212	-2.1517	-1.5653
15.6	2.4853	-5.57618	0.581082	5.24415										-0.989848	-1.33214	-0.908571	-0.487487	-1.75728	-2.20827	-2.12364	-1.54791
15.7	2.4853	-3.62308	1.55758	5.73245										-0.598399	-1.09244	-1.07486	-0.588326	-1.67419	-2.2081	-2.02543	-1.68379
15.8	3.4619	-3.13478	1.55758	4.75585										-0.665444	-1.00216	-1.32003	-0.227907	-1.68549	-2.03722	-1.92506	-1.74211
15.9	2.9736	-3.62308	2.04588	4.26755										-0.891327	-1.06474	-1.37569	-0.09344	-1.74238	-1.96164	-1.95245	-1.73115
16	1.5088	-3.62308	1.55758	4.26755										-0.737599	-1.54038	-1.56169	-0.321641	-1.84416	-1.95797	-2.08786	-1.68257
16.1	0.043903	-4.59958	1.55758	4.75585										-0.452842	-1.19378	-1.03361	-0.577258	-1.81111	-1.96477	-2.13779	-1.64774
16.2	-0.932597	-5.08788	0.581082	4.26755										-0.245597	-1.1662	-1.06753	-0.589469	-1.80726	-1.94466	-2.03359	-1.58805
16.3	0.532203	-3.62308	0.581082	4.75585										-0.236607	-1.14319	-0.757895	-0.463459	-1.77078	-1.87405	-1.85142	-1.55823
16.4	-1.4209	-3.62308	-0.395518	3.77925										-0.794319	-1.08354	-0.840305	-0.162072	-1.80683	-1.98119	-1.76752	-1.58907
16.5	-0.932597	-2.64648	0.092782	5.24415										-0.294377	-1.16824	-1.03044	-0.210183	-1.7729	-1.95206	-1.8295	-1.61264
16.6	0.043903	-2.15818	-0.395518	6.22075										-0.407675	-1.28989	-1.23559	-0.484627	-1.74953	-1.8053	-1.88885	-1.5334
16.7	-1.4209	-2.15818	-0.395518	4.26755										-0.133197	-1.02059	-1.356	-0.403977	-1.64425	-1.58761	-1.87721	-1.48572
16.8	-0.444297	-2.64648	-0.395518	3.29105										-0.155291	-0.938687	-1.0688	-0.100598	-1.55617	-1.48444	-1.78281	-1.50249
16.9	1.0205	-1.66988	-0.395518	4.75585										-0.593644	-0.997412	-0.967384	-0.291224	-1.41903	-1.52152	-1.72143	-1.53359
17	0.043903	-2.15818	-0.395518	6.70895										-0.485479	-0.721078	-1.52096	-0.510731	-1.3849	-1.51287	-1.7085	-1.53796
17.1	0.043903	-3.13478	1.06938	5.24415										-0.148327	-1.01115	-1.08926	-1.22651	-1.43256	-1.46159	-1.7005	-1.4443
17.2	0.532203	-3.13478	1.55758	4.75585										-0.508398	-0.897077	-1.02065	-0.355986	-1.50586	-1.32895	-1.66585	-1.31441
17.3	2.4853	-1.18168	0.581082	3.77925										-0.7423	-0.904704	-1.31892	-0.00564012	-1.49453	-1.28998	-1.54385	-1.12433
17.4	1.5088	-1.18168	1.55758	3.77925										-0.465506	-1.22341	-1.42634	-0.449336	-1.44632	-1.40456	-1.54905	-1.09648
17.5	-0.444297	-0.693379	-0.395518	4.75585										-1.2036	-1.61575	-1.09011	-0.601217	-1.41212	-1.51391	-1.47076	-1.06296
17.6	0.043903	-1.18168	-0.883818	5.24415										-0.905023	-0.990071	-0.631086	-0.654146	-1.4279	-1.50677	-1.50261	-1.1624
17.7	0.532203	-1.66988	1.06938	5.24415										-0.835981	-0.817859	-0.543606	-0.348465	-1.52388	-1.48159	-1.4435	-1.10065
17.8	-0.444297	-3.13478	2.53418	5.73245										-0.663727	-0.669546	-0.50658	-0.320464	-1.54808	-1.48588	-1.53052	-1.17205
17.9	-0.932597	-2.64648	1.55758	4.75585										-0.824579	-0.973613	-1.00884	-1.21296	-1.4856	-1.43588	-1.6248	-1.23884
18	0.532203	-4.11138	0.581082	5.73245										-1.13214	-0.774243	-1.05599	-1.24593	-1.38571	-1.26538	-1.57591	-1.30961
18.1	1.9971	-4.59958	-0.395518	4.75585										-0.850545	-1.10531	-1.00407	-0.896972	-1.42628	-1.05918	-1.36845	-1.34012
18.2	1.9971	-3.62308	0.581082	4.75585										-0.881444	-1.15434	-1.2247	-0.842636	-1.58354	-1.01717	-1.16785	-1.34176
18.3	1.0205	-1.18168	-0.395518	6.22075										-0.955619	-1.03263	-1.10043	-0.769127	-1.72813	-1.05056	-1.12632	-1.25487
18.4	-0.444297	-2.64648	-0.883818	5.73245										-1.58747	-0.964798	-0.768837	-0.855028	-1.70366	-1.07849	-1.22739	-1.15654
18.5	0.043903	-1.66988	0.092782	6.22075										-1.39839	-1.00607	-0.627024	-0.936276	-1.68785	-1.13542	-1.27397	-1.05073
18.6	0.532203	-0.693379	1.06938	5.73245										-1.151	-1.35419	-0.844996	-0.853088	-1.66953	-1.07135	-1.21596	-1.00761
18.7	-0.444297	-0.205079	-0.395518	4.26755										-0.9387	-1.40642	-1.34856	-0.873063	-1.73026	-1.01563	-1.07512	-0.940749
18.8	1.0205	0.283221	-0.395518	2.31445										-0.944283	-1.22589	-0.889782	-0.947007	-1.74835	-0.926442	-1.03216	-0.901627
18.9	0.043903	0.283221	-0.395518	3.29105										-0.939293	-1.0162	-1.01717	-1.22995	-1.73299	-0.934133	-1.12167	-0.891238
19	-1.4209	-1.18168	0.092782	4.75585										-1.02872	-1.38428	-0.731864	-1.34875	-1.63613	-0.898618	-1.20437	-0.939647
19.1	-0.444297	-0.205079	0.581082	4.26755										-0.839893	-1.43462	-1.04955	-1.30371	-1.54988	-0.884172	-1.20061	-1.03646
19.2	-1.9092	-0.205079	0.581082	3.77925										-0.598831	-1.61038	-1.02794	-0.987437	-1.47566	-0.895842	-1.11454	-1.20562
19.3	-0.444297	-0.693379	1.55758	5.73245										-0.673465	-1.49834	-0.968558	-0.761878	-1.39705	-0.900093	-1.04609	-1.23508
19.4	1.5088	0.283221	-0.395518	5.24415										-1.00706	-1.32971	-0.830796	-0.764535	-1.35051	-0.731351	-0.98001	-1.21111
19.5	1.0205	0.283221	-0.395518	6.22075										-0.67901	-1.49275	-0.78676	-0.972178	-1.35504	-0.551684	-0.968792	-1.19745
19.6	-1.4209	-1.18168	-0.395518	5.73245										-1.21217	-1.48826	-2.09356	-1.00815	-1.41984	-0.564837	-0.992775	-1.26066
19.7	-0.444297	-2.15818	0.092782	5.73245										-0.986781	-1.77179	-1.14974	-1.23506	-1.40379	-0.703014	-0.906653	-1.22662
19.8	0.043903	-1.66988	-1.37212	5.73245										-1.14877	-1.60142	-0.721776	-1.31276	-1.39171	-0.771263	-0.799614	-1.15881
19.9	0.043903	-0.205079	-0.395518	3.29105										-1.23156	-1.96548	-1.22601	-0.795598	-1.37292	-0.657823	-0.757452	-1.1137
20	-1.9092	0.771521	1.06938	3.29105										-1.11164	-1.42221	-1.48182	-0.741107	-1.30823	-0.77296	-0.859905	-1.18645
20.1	-0.932597	1.74802	0.092782	4.75585										-1.26256	-1.59549	-1.28691	-1.00176	-1.2138	-0.913133	-0.929059	-1.16239
20.2	0.043903	0.771521	-0.395518	4.75585										-1.29661	-1.65309	-1.45456	-1.04739	-1.14817	-1.00334	-0.944621	-1.10815
20.3	-1.9092	-1.18168	1.06938	4.26755										-1.88749	-1.56085	-1.69934	-0.761864	-1.13028	-0.804313	-0.884506	-1.01759
20.4	0.532203	-1.66988	2.04588	5.73245										-1.6651	-1.31917	-1.80162	-0.878866	-1.09949	-0.666934	-0.933429	-1.0531
20.5	1.5088	-1.18168	1.06938	6.22075										-1.56604	-1.31615	-1.82939	-0.862493	-1.08994	-0.744227	-0.937363	-1.06071
20.6	1.5088	0.771521	0.581082	6.70895										-1.37643	-1.41663	-2.27817	-0.824471	-1.13766	-0.683677	-0.978277	-1.00447
20.7	1.0205	-0.205079	-0.395518	8.17385										-1.57205	-1.31848	-1.80272	-1.0791	-1.11948	-0.624882	-0.962135	-0.864282
20.8	0.532203	-0.205079	-0.395518	7.19725										-1.70789	-1.57181	-1.52388	-1.07359	-1.05825	-0.564304	-0.963679	-0.804747
20.9	1.0205	-1.66988	0.092782	5.24415										-1.34679	-1.40135	-1.60318	-1.07541	-0.985178	-0.671388	-0.899768	-0.881028
21	0.532203	-1.66988	2.04588	5.24415										-1.48069	-1.51698	-2.20594	-0.967795	-0.925657	-0.634228	-0.7112	-0.888474
21.1	0.043903	-1.18168	1.55758	5.24415										-1.55571	-1.70047	-2.24825	-0.86414	-0.948575	-0.416676	-0.664782	-0.900645
21.2	1.0205	-0.205079	1.55758	6.70895										-1.53662	-1.30602	-2.04978	-1.03197	-1.06836	-0.256617	-0.707079	-0.79946
21.3	0.043903	-0.693379	0.581082	6.22075										-1.46857	-1.46343	-1.83836	-1.2083	-1.18397	-0.304401	-0.859751	-0.867229
21.4	1.9971	-0.693379	0.092782	6.22075										-1.02873	-1.39799	-1.26021	-0.94097	-1.16365	-0.462529	-0.82595	-0.87389
21.5	-0.444297	-0.205079	0.092782	5.73245										-1.26941	-1.10324	-0.942509	-0.918619	-1.01982	-0.65639	-0.824219	-0.893175
21.6	-0.444297	1.25972	1.06938	6.22075										-1.32741	-1.20578	-1.44937	-0.779575	-0.88572	-0.700998	-0.822014	-0.785033
21.7	-1.9092	0.283221	2.04588	7.19725										-1.50581	-1.66199	-1.58272	-0.563888	-0.818334	-0.653382	-0.903687	-0.716173
21.8	-1.9092	-0.693379	1.55758	5.73245										-1.1262	-1.82009	-1.38635	-0.834773	-0.818005	-0.562589	-0.828913	-0.635582
21.9	-2.3975	-2.15818	1.06938	5.73245										-1.46327	-0.97667	-1.418	-1.11452	-0.849023	-0.451498	-0.822002	-0.686811
22	0.043903	-1.18168	1.06938	7.19725										-1.30378	-1.79501	-0.951108	-1.14064	-0.851627	-0.407801	-0.791825	-0.74402
22.1	0.043903	-0.693379	1.06938	5.73245										-1.36136	-1.74063	-1.08165	-0.905795	-0.804145	-0.336359	-0.810773	-0.779583
22.2	0.532203	0.771521	1.55758	5.24415										-1.14778	-1.86554	-1.3031	-0.740413	-0.742645	-0.33782	-0.749868	-0.722709
22.3	-0.932597	-0.693379	0.092782	5.73245										-0.83815	-1.56716	-1.28843	-0.957105	-0.785535	-0.534237	-0.786641	-0.697185
22.4	-0.932597	0.283221	0.092782	5.24415										-1.35278	-1.63544	-1.23894	-1.07251	-0.797386	-0.504344	-0.804592	-0.66983
22.5	-0.444297	0.771521	0.092782	4.75585										-1.17865	-1.77294	-1.35294	-0.942478	-0.758205	-0.546691	-0.755246	-0.578237
22.6	-0.444297	0.283221	0.092782	5.24415										-1.14417	-1.71406	-0.539955	-1.0514	-0.677499	-0.501841	-0.686532	-0.506766
22.7	-1.4209	-0.205079	-0.883818	6.22075										-1.16567	-1.98092	-1.89739	-1.07594	-0.660278	-0.625859	-0.667284	-0.507134
22.8	-1.4209	0.771521	-1.86032	5.73245										-1.04591	-1.90183	-1.37423	-1.10982	-0.755065	-0.668458	-0.763636	-0.623672
22.9	0.532203	2.23632	0.092782	4.75585										-1.60561	-1.63262	-1.26633	-1.19017	-0.833951	-0.463615	-0.777862	-0.63751
23	0.043903	0.771521	0.581082	4.75585										-1.31986	-2.07059	-2.15197	-1.11032	-0.829503	-0.380258	-0.893769	-0.533
23.1	1.0205	-0.693379	0.092782	6.22075										-1.16875	-2.09124	-2.42757	-0.969515	-0.778157	-0.350668	-0.973429	-0.426416
23.2	1.0205	-2.64648	0.581082	6.70895										-1.36463	-1.68959	-2.164	-1.07619	-0.67208	-0.494057	-1.03071	-0.416948
23.3	-0.932597	-1.18168	-1.86032	6.70895										-1.65387	-1.8608	-2.38514	-1.17591	-0.686697	-0.437133	-0.907749	-0.472933
23.4	-0.932597	1.25972	-0.395518	5.73245										-1.62915	-2.20037	-2.24926	-1.05328	-0.669999	-0.275176	-0.771	-0.525384
23.5	-1.9092	2.72462	0.581082	6.70895										-1.41848	-2.33838	-2.69372	-1.1553	-0.695544	-0.263249	-0.728308	-0.569158
23.6	-0.932597	2.72462	1.06938	6.70895										-1.20634	-2.21461	-2.25411	-1.14422	-0.694061	-0.328447	-0.80603	-0.551978
23.7	1.0205	2.72462	0.092782	4.75585										-1.07839	-2.30735	-2.22724	-1.03317	-0.653624	-0.489127	-0.931071	-0.521081
23.8	1.0205	2.23632	0.581082	6.22075										-1.2439	-2.16887	-2.1002	-1.17458	-0.557143	-0.485651	-0.93572	-0.423269
23.9	-0.444297	0.771521	0.092782	6.70895										-1.43276	-1.89423	-1.89365	-1.80394	-0.506314	-0.443276	-0.829258	-0.455839
24	-0.932597	0.283221	-0.395518	6.22075										-1.37147	-1.89247	-2.22222	-1.55302	-0.539361	-0.38748	-0.717343	-0.527818
24.1	-2.3975	2.72462	0.092782	5.24415										-0.759074	-1.75776	-2.61709	-1.31176	-0.628834	-0.330609	-0.644312	-0.541466
24.2	-2.3975	1.74802	-0.883818	5.24415										-1.51563	-2.50845	-2.37823	-1.34119	-0.585652	-0.297782	-0.659638	-0.54567
24.3	-0.932597	1.25972	-0.395518	4.75585										-1.46434	-2.22355	-1.96044	-1.33588	-0.522502	-0.253965	-0.567361	-0.447788
24.4	-1.4209	2.72462	-0.395518	5.24415										-1.36057	-2.00628	-2.03653	-1.61346	-0.414938	-0.302163	-0.456599	-0.437136
24.5	-0.932597	2.72462	1.55758	5.24415										-1.56823	-2.25087	-1.65008	-1.44044	-0.287125	-0.261975	-0.31942	-0.371304
24.6	0.043903	0.771521	1.55758	5.73245										-1.85813	-2.21066	-1.9362	-0.532631	-0.298137	-0.291817	-0.357	-0.421351
24.7	1.0205	1.25972	-0.395518	6.22075										-1.81696	-2.04643	-2.186	-1.28362	-0.319633	-0.133496	-0.445025	-0.355311
24.8	0.532203	1.74802	0.092782	5.24415										-1.78261	-2.26403	-2.56506	-1.41099	-0.332649	-0.139177	-0.490017	-0.305756
24.9	1.0205	1.74802	1.55758	5.24415										-1.65269	-2.49188	-2.791	-1.24234	-0.203813	-0.0355985	-0.499566	-0.267772
25	0.532203	0.283221	0.581082	5.24415										-1.4022	-1.92493	-1.856	-1.0645	-0.164924	-0.0442323	-0.423023	-0.280377
25.1	-1.4209	2.23632	1.06938	6.22075										-1.24701	-1.35738	-1.89902	-0.952026	-0.219732	-0.0693116	-0.382624	-0.269177
25.2	-1.9092	1.25972	0.581082	6.22075										-1.84227	-1.65634	-2.49879	-0.866441	-0.369791	-0.144094	-0.343564	-0.308745
25.3	-0.444297	-0.205079	-0.395518	5.73245										-1.27444	-1.92026	-2.33598	-0.944032	-0.439188	-0.145155	-0.334008	-0.254539
25.4	0.532203	1.74802	-1.37212	5.73245										-1.52067	-1.97967	-2.02949	-0.950321	-0.383558	-0.221017	-0.405179	-0.294363
25.5	0.532203	1.74802	-0.883818	4.26755										-1.58594	-1.60029	-2.01206	-1.26882	-0.258569	-0.243267	-0.46428	-0.313705
25.6	0.043903	1.25972	0.092782	2.80275										-1.56192	-1.93144	-2.03057	-1.1912	-0.262242	-0.215935	-0.575917	-0.405533
25.7	1.5088	0.771521	0.581082	4.26755										-1.70059	-1.77827	-1.8196	-0.758654	-0.365526	-0.0533564	-0.603045	-0.414789
25.8	1.9971	1.25972	0.092782	5.73245										-1.88212	-1.72617	-2.24766	-0.829017	-0.48005	0.00539239	-0.492968	-0.30902
25.9	0.043903	1.74802	0.092782	6.22075										-1.25079	-2.04924	-2.44795	-1.03055	-0.499145	0.0118297	-0.402728	-0.307451
26	-1.9092	0.771521	0.581082	6.22075										-1.56374	-1.96315	-2.26267	-0.952915	-0.510515	-0.0911514	-0.363196	-0.274788
26.1	-0.932597	0.771521	0.092782	3.77925										-1.24371	-1.61597	-2.37601	-0.549116	-0.451303	-0.0721383	-0.454705	-0.279478
26.2	0.043903	1.74802	0.092782	3.77925										-1.50037	-1.95498	-1.88262	-0.781405	-0.333023	-0.0627604	-0.481053	-0.278194
26.3	0.532203	3.21292	0.092782	5.73245										-1.50198	-2.19284	-1.75447	-0.989078	-0.279036	-0.0177106	-0.387405	-0.233141
26.4	0.532203	2.72462	0.581082	6.22075										-1.53846	-2.13359	-1.46383	-0.419359	-0.348625	0.00168416	-0.298032	-0.245382
26.5	0.532203	0.771521	0.092782	5.73245										-1.60265	-1.54862	-1.79321	-0.496229	-0.518733	0.128597	-0.186837	-0.289958
26.6	1.0205	0.283221	0.581082	6.70895										-1.47269	-1.35955	-1.49429	-0.595994	-0.465796	0.230472	-0.199241	-0.438781
26.7	-0.444297	0.771521	0.092782	5.73245										-1.1581	-1.68837	-1.54987	-0.606173	-0.365737	0.198041	-0.200481	-0.514965
26.8	0.532203	1.25972	0.092782	6.70895										-0.912557	-1.61169	-1.61129	-0.637534	-0.274534	0.160141	-0.230376	-0.405824
26.9	-1.4209	1.25972	-1.86032	5.24415										-0.779746	-1.23885	-1.80683	-0.595404	-0.403338	0.22806	-0.260644	-0.338763
27	-2.3975	1.74802	-0.883818	5.24415										-0.892107	-1.45169	-2.24917	-0.429862	-0.524399	0.34733	-0.253297	-0.340018
27.1	-0.932597	1.74802	0.092782	5.24415										-0.900636	-1.54232	-1.66358	-0.761562	-0.53606	0.366906	-0.20186	-0.405147
27.2	0.043903	0.771521	1.06938	4.75585										-1.18858	-1.30782	-1.94753	-0.644196	-0.429806	0.346555	-0.201418	-0.429427
27.3	-2.3975	0.771521	0.092782	4.26755										-0.966002	-1.5392	-1.66179	-0.977945	-0.331512	0.413993	-0.130064	-0.406882
27.4	0.043903	0.771521	1.06938	4.75585										-0.756319	-1.47317	-2.31535	-0.879929	-0.268735	0.433585	-0.0934557	-0.415804
27.5	0.532203	0.771521	0.092782	5.73245										-1.24448	-1.23338	-1.61826	-0.956404	-0.295561	0.397545	0.0864513	-0.34238
27.6	1.5088	0.283221	-0.883818	6.22075										-1.65286	-1.37851	-1.54875	-0.77675	-0.373723	0.249546	0.117165	-0.302621
27.7	1.9971	1.25972	-1.37212	7.19725										-0.863167	-1.57464	-1.77111	-0.687896	-0.375675	0.189203	-0.0121611	-0.217102
27.8	0.532203	1.25972	0.581082	7.19725										-1.37415	-1.71145	-1.73138	-0.811158	-0.274936	0.146979	-0.156515	-0.246736
27.9	0.043903	0.283221	2.04588	4.75585										-1.52277	-1.68633	-1.88117	-0.754225	-0.0774922	0.292233	-0.288412	-0.290471
28	-0.444297	1.25972	0.581082	5.24415										-1.63074	-1.22253	-1.82643	-1.15332	0.0218389	0.439879	-0.286791	-0.335343
28.1	-0.444297	2.23632	-0.395518	6.70895										-1.37004	-1.50841	-1.84744	-2.11256	-0.00318858	0.508734	-0.297725	-0.269599
28.2	-0.444297	1.25972	0.581082	6.70895										-1.47958	-1.70161	-1.93529	-1.30496	-0.0766175	0.468799	-0.250942	-0.208942
28.3	-0.444297	1.25972	0.092782	6.70895										-1.56368	-1.88636	-1.89531	-1.02419	-0.0988894	0.248634	-0.275625	-0.193551
28.4	0.043903	3.21292	-0.395518	7.68555										-1.44929	-1.42816	-1.54069	-1.32116	-0.0525542	0.187073	-0.326022	-0.188093
28.5	-1.4209	3.21292	-0.395518	6.22075										-1.35256	-1.93349	-1.08824	-1.20487	0.0383496	0.213405	-0.322741	-0.221286
28.6	-0.932597	2.23632	-0.883818	5.73245										-1.22489	-1.61305	-1.13106	-1.12495	0.0816052	0.285635	-0.280842	-0.23775
28.7	-1.9092	1.25972	-2.34862	4.75585										-1.45017	-1.61404	-1.30913	-1.04578	-0.0203085	0.312303	-0.239261	-0.225377
28.8	-2.3975	1.25972	-1.86032	4.75585										-1.42601	-1.84359	-1.37533	-1.22653	-0.132831	0.214975	-0.2288	-0.152576
28.9	-0.932597	0.283221	-1.86032	5.24415										-0.972348	-1.80655	-1.55868	-1.254	-0.073479	0.173322	-0.221798	-0.106755
29	0.532203	1.25972	-0.883818	6.22075										-1.56602	-1.56144	-1.79853	-1.0989	0.074421	0.177648	-0.215497	-0.100642
29.1	-0.932597	3.21292	0.581082	6.22075										-1.7155	-1.93458	-1.86075	-1.0969	0.131009	0.312272	-0.188055	-0.0400846
29.2	1.0205	2.23632	-0.395518	6.22075										-1.53994	-1.6715	-1.51281	-0.956743	-0.034892	0.235807	-0.136686	-0.0262827
29.3	1.5088	0.283221	-0.395518	6.70895										-1.54164	-1.83623	-1.46907	-1.03172	-0.124643	0.32247	-0.142871	-0.0111672
29.4	0.043903	1.74802	-0.395518	5.24415										-0.931628	-2.04212	-1.95753	-1.38136	-0.0669235	0.0957222	-0.241834	-0.0787601
29.5	-1.9092	3.21292	-0.883818	5.24415										-1.6647	-2.16828	-1.38038	-1.64467	0.22985	0.159232	-0.358787	-0.192081
29.6	-0.444297	3.21292	-0.395518	4.75585										-1.86146	-2.13954	-0.74335	-1.42566	0.397463	0.123223	-0.409825	-0.330393
29.7	0.043903	2.23632	1.55758	4.26755										-1.74525	-2.34239	-1.89792	-0.853781	0.464648	0.266134	-0.351542	-0.342379
29.8	-0.444297	3.70122	0.581082	5.73245										-1.72274	-1.74349	-1.51273	-0.905146	0.25638	0.414493	-0.287031	-0.239349
29.9	-0.932597	3.21292	-2.34862	7.19725										-1.91539	-2.4407	-1.35006	-1.17714	0.0710657	0.321051	-0.240409	-0.196037
30	0.532203	2.23632	-3.32522	7.68555										-2.19492	-2.08447	-0.889753	-1.33304	0.121603	0.268153	-0.22971	-0.198633
30.1	0.532203	2.23632	-1.86032	6.22075										-2.27454	-1.65083	-0.507486	-1.12337	0.0845143	0.274768	-0.265286	-0.240825
30.2	0.532203	2.72462	-0.883818	6.22075										-2.45352	-1.90952	-0.720677	-0.821965	0.179615	0.343393	-0.332754	-0.0499837
30.3	-0.444297	3.21292	-2.83692	5.24415										-2.22184	-1.61844	-0.749083	-0.921078	-0.044782	0.409597	-0.335356	0.0758712
30.4	0.532203	3.21292	-3.81352	5.24415										-2.27618	-1.55369	-0.900705	-1.16143	-0.018486	0.429815	-0.519766	0.131175
30.5	1.5088	4.18942	-4.30172	4.26755										-2.2164	-1.65877	-0.950835	-0.998148	-0.0244049	0.462497	-0.519783	-0.019356
30.6	-0.444297	2.72462	-5.76662	5.24415										-1.10354	-1.95129	-1.04822	-0.768189	0.0473056	0.449847	-0.523917	-0.155305
30.7	1.5088	3.21292	-5.76662	6.22075										-2.16768	-1.82331	-0.999903	-0.567858	0.163377	0.317008	-0.135991	-0.213982
30.8	0.532203	2.72462	-5.76662	6.22075										-2.1768	-1.7479	-0.876089	-0.474459	0.337716	0.280895	-0.129503	-0.263101
30.9	-0.444297	2.23632	-5.76662	5.73245										-2.44232	-1.54778	-0.856163	-0.834771	0.303924	0.253172	-0.183991	-0.272104
31	0.532203	2.72462	-7.71972	6.22075										-2.54747	-1.01923	-0.654633	-1.05953	0.177672	0.288367	-0.314795	-0.175
31.1	1.9971	1.74802	-6.25492	4.75585										-1.98605	-1.67759	-0.612639	-0.997105	-0.010294	0.204104	-0.246275	-0.0750964
31.2	-0.932597	1.25972	-5.76662	3.77925										-2.50413	-1.82961	-1.15848	-1.28178	-0.192565	0.165769	-0.119268	-0.0253906
31.3	-1.9092	2.72462	-7.23142	4.75585										-2.71935	-1.6202	-1.07706	-1.23624	-0.0760656	0.0707241	-0.0145661	-0.123528
31.4	-0.444297	0.771521	-7.23142	5.73245										-2.1161	-1.47028	-0.746663	-1.11006	-0.0314704	0.141564	0.0496387	-0.268867
31.5	1.9971	1.74802	-8.20802	4.75585										-2.00372	-1.32687	-0.782482	-1.39209	0.154312	0.0772888	-0.00988742	-0.363949
31.6	-0.444297	3.21292	-7.23142	5.24415										-2.21875	-1.52169	-1.10065	-0.9157	0.00868445	0.0150672	-0.23065	-0.368792
31.7	-2.3975	3.21292	-7.71972	5.24415										-2.78832	-1.11469	-0.989672	-0.986972	-0.112431	-0.19873	-0.352145	-0.383041
31.8	-0.932597	2.72462	-6.74312	4.75585										-2.32124	-1.68938	-1.23616	-0.77657	-0.328187	-0.214552	-0.458583	-0.367096
31.9	-0.444297	2.23632	-7.71972	4.75585										-1.87473	-1.78021	-0.293036	-0.93653	-0.31	-0.153498	-0.528675	-0.354593
32	-0.444297	0.283221	-7.23142	6.22075										-1.82465	-1.53461	-0.467452	-1.21925	-0.212729	0.00153567	-0.509775	-0.294563
32.1	1.5088	1.25972	-7.23142	6.70895										-2.0736	-1.35962	0.221471	-1.17153	0.281708	0.141315	-0.491433	-0.210495
32.2	1.9971	0.771521	-6.74312	6.22075										-2.13541	-1.35776	-0.488234	-1.36652	0.224	0.256366	-0.32546	-0.221205
32.3	1.9971	0.771521	-7.71972	6.22075										-2.17055	-1.23784	-0.137626	-1.64992	0.153628	0.406464	-0.291276	-0.12492
32.4	1.5088	2.72462	-8.20802	5.73245										-2.13708	-1.94898	0.0308294	-1.41739	-0.107098	0.352857	-0.151077	0.0304617
32.5	-1.9092	1.25972	-6.25492	5.73245										-2.18108	-1.74953	-0.620862	-1.28094	0.014464	0.301878	-0.217632	0.0138106
32.6	-0.444297	2.23632	-6.74312	5.24415										-2.03996	-1.41026	-0.54943	-1.25971	0.036943	0.221702	-0.272304	-0.0177468
32.7	0.532203	2.23632	-7.71972	5.73245										-2.00593	-1.64586	-0.804772	-1.31902	-0.0081827	0.230294	-0.395339	-0.20143
32.8	-0.932597	1.74802	-6.74312	5.24415										-2.26412	-1.17253	-0.430119	-1.16157	-0.0949292	0.159615	-0.124327	-0.141731
32.9	-0.444297	1.74802	-7.71972	5.24415										-2.42134	-1.27626	-0.402375	-1.01915	-0.311247	0.15338	-0.0643859	-0.213182
33	1.5088	1.74802	-7.23142	5.24415										-2.2603	-1.27719	-0.83166	-0.845604	-0.273402	0.316572	-0.0792187	-0.168013
33.1	0.043903	2.23632	-6.25492	5.24415										-2.41376	-1.32681	-1.16966	-0.845003	-0.329935	0.442509	-0.436428	-0.213929
33.2	0.043903	2.23632	-7.23142	6.22075										-2.03189	-0.953606	-0.737562	-1.37786	-0.0729309	0.420393	-0.466976	-0.273483
33.3	1.0205	3.21292	-7.71972	7.19725										-2.66957	-1.12713	-0.20302	-1.64686	-0.0806726	0.321261	-0.441745	-0.254682
33.4	-0.932597	2.23632	-6.25492	5.73245										-2.61416	-0.899745	-0.382543	-1.46217	-0.0452399	0.484563	-0.53893	-0.127958
33.5	-2.3975	1.74802	-6.25492	5.73245										-2.21881	-1.10132	-0.635742	-1.59648	-0.0910809	0.364701	-0.540347	0.0440243
33.6	-1.4209	0.283221	-6.74312	6.22075										-2.29516	-1.32253	-0.298456	-1.83153	-0.208253	0.237614	-0.431075	0.0475436
33.7	-0.444297	0.283221	-6.74312	4.75585										-2.3209	-1.34117	-1.01914	-1.72468	-0.178338	-0.0295506	-0.356141	0.0285153
33.8	-1.4209	0.771521	-6.74312	5.73245										-3.01423	-1.62986	-0.924198	-1.47891	-0.156401	0.107772	-0.338082	0.0417318
33.9	-0.932597	0.283221	-7.23142	5.24415										-2.52421	-1.41322	-0.424949	-1.07595	-0.0269029	0.211467	-0.461005	0.110939
34	-0.444297	1.74802	-6.74312	4.26755										-2.03777	-1.5069	-0.374837	-0.865436	-0.138462	0.088732	-0.432089	0.0707478
34.1	-1.4209	2.23632	-6.25492	5.24415										-2.29762	-1.49349	-0.774057	-0.954359	-0.268828	0.0436721	-0.459492	0.0717372
34.2	-1.9092	0.771521	-7.23142	5.24415										-2.44834	-1.28317	-0.448092	-1.48534	-0.300549	0.08104	-0.384586	-0.0323707
34.3	-1.4209	2.72462	-6.74312	7.19725										-2.66126	-1.41117	-0.425919	-1.90445	-0.238005	0.317585	-0.325073	-0.0113055
34.4	-1.4209	3.21292	-5.76662	7.68555										-2.5526	-1.56873	-0.194739	-1.64034	-0.192529	0.416061	-0.218658	-0.00773369
34.5	0.043903	2.23632	-5.27832	6.70895										-2.14204	-1.36176	-0.308097	-1.35894	-0.207493	0.383682	-0.221591	-0.0247238
34.6	1.5088	1.25972	-6.25492	3.77925										-2.12049	-1.28653	-0.507258	-1.42367	-0.267835	0.182839	-0.25886	-0.0603624
34.7	1.5088	1.74802	-6.25492	4.75585										-2.45152	-1.56727	-0.65574	-1.66248	-0.379906	0.125082	-0.259626	0.0280354
34.8	1.0205	3.21292	-7.71972	6.22075										-2.61306	-1.70762	-0.793547	-1.7983	-0.482062	0.0581392	-0.276711	0.127307
34.9	0.532203	2.72462	-7.23142	6.22075										-2.64596	-1.49766	-0.898927	-1.79925	-0.453201	0.0838634	-0.200565	0.335012
35	0.532203	3.21292	-5.27832	5.73245										-2.72108	-1.45981	-0.662034	-1.64094	-0.411853	0.0456805	-0.0900753	0.414761
35.1	-0.444297	2.72462	-6.25492	4.26755										-3.30645	-1.28592	-0.268325	-1.06041	-0.640505	0.079564	-0.0419781	0.334017
35.2	-0.932597	2.23632	-5.76662	3.77925										-2.76889	-1.33089	-0.415278	-1.55416	-0.732903	0.158817	-0.0120539	0.185956
35.3	-0.444297	0.771521	-4.79002	3.77925										-2.54602	-1.88826	-0.600574	-1.45737	-0.868842	0.140313	-0.214454	0.0515817
35.4	1.0205	0.771521	-4.79002	5.24415										-2.66983	-1.54149	-0.700242	-1.40614	-0.697663	0.150669	-0.261536	0.0748759
35.5	0.532203	1.74802	-5.27832	5.73245										-2.67998	-1.88198	-0.634979	-1.22761	-0.745162	0.303434	-0.389163	0.146396
35.6	0.043903	1.74802	-4.30172	6.22075										-2.29797	-1.60417	0.0250674	-1.09737	-0.635285	0.327503	-0.0983783	0.233556
35.7	0.532203	2.23632	-6.25492	6.22075										-2.66855	-1.53001	-0.204007	-1.26598	-0.58641	0.223524	0.061722	0.250742
35.8	0.532203	0.771521	-6.25492	6.22075										-2.84912	-1.7275	-0.792142	-0.718527	-0.553192	-0.22638	0.218477	0.0752814
35.9	-0.932597	1.25972	-4.79002	5.73245										-3.11728	-1.76425	-0.850915	-1.03712	-0.561818	-0.202461	0.153885	-0.127176
36	-2.3975	2.72462	-4.79002	6.22075										-2.27088	-1.6079	-0.71496	-1.03321	-0.536578	-0.0877642	0.191436	-0.237785
36.1	-0.444297	1.74802	-3.81352	6.70895										-2.16051	-0.99664	-0.560636	-1.02573	-0.472117	0.434672	0.214854	-0.0506737
36.2	1.5088	0.283221	-4.30172	6.70895										-2.11699	-1.2197	-0.677829	-1.19104	-0.39734	0.474449	0.0850202	0.0442365
36.3	1.0205	-0.205079	-5.27832	5.24415										-2.02234	-1.40578	-0.556895	-1.26127	-0.474672	0.537161	0.0801488	0.0755807
36.4	0.043903	0.283221	-5.76662	5.24415										-2.02826	-1.0913	-0.201843	-1.10066	-0.34353	0.120834	0.0531666	-0.0202983
36.5	-0.444297	2.23632	-6.74312	5.24415										-2.05909	-0.673467	-0.289167	-0.985584	-0.309122	0.0256074	0.139982	0.0872435
36.6	1.0205	1.74802	-6.74312	5.73245										-2.02131	-0.525742	-0.515529	-1.23846	-0.0922544	0.00444023	0.0886852	0.386601
36.7	-1.4209	1.74802	-6.25492	5.24415										-2.2074	-1.08018	-0.910076	-0.812273	-0.280231	-0.155701	0.0348208	0.388277
36.8	-0.932597	3.21292	-6.74312	5.24415										-2.12592	-1.41253	-0.350735	-1.27073	-0.0652142	0.0139466	0.0316044	0.238789
36.9	0.043903	0.771521	-4.79002	5.73245										-2.05349	-1.13796	-0.664721	-0.955834	0.0669321	-0.0240558	0.0145378	0.11881
37	-0.932597	1.25972	-4.30172	4.26755										-2.02417	-1.22353	-0.683312	-0.989943	0.191918	0.247866	0.0569116	0.116165
37.1	0.532203	2.23632	-2.83692	4.75585										-2.18161	-1.49385	-1.06623	-1.02679	0.126003	0.134738	0.0371179	0.364765
37.2	1.9971	0.771521	-1.86032	5.73245										-2.16781	-1.5405	-0.951635	-1.47874	0.110792	0.190206	0.101194	0.344517
37.3	-0.444297	1.25972	-3.32522	5.73245										-2.6098	-1.79559	-0.640236	-1.49017	0.205687	0.235455	0.130461	0.222001
37.4	0.043903	4.18942	-3.81352	6.70895										-2.14711	-1.53362	-0.522138	-1.24053	0.0325917	0.13807	0.138421	0.0646424
37.5	-0.932597	2.23632	-4.79002	6.22075										-2.38211	-1.54899	-0.621864	-1.34531	0.0804482	0.0631968	0.145468	-0.0750168
37.6	0.043903	1.25972	-4.79002	4.26755										-2.83897	-1.71769	-0.982856	-1.51668	0.0624539	0.159932	0.124702	0.137207
37.7	0.043903	1.25972	-2.34862	3.77925										-2.31019	-2.40088	-0.775569	-1.56968	0.324754	0.320764	0.232972	0.118819
37.8	-0.932597	0.771521	-2.34862	5.24415										-2.58606	-2.2439	-0.118474	-1.32853	0.341308	0.52503	0.210324	0.316818
37.9	1.9971	0.771521	-3.32522	5.73245										-2.23914	-2.00135	-0.693318	-1.00718	0.432926	0.159265	0.198568	0.247644
38	1.9971	2.72462	-3.32522	5.24415										-2.05826	-2.10777	-1.20249	-1.18355	0.292024	0.0822618	-0.0172147	0.23112
38.1	1.5088	2.23632	-4.30172	6.70895										-2.41865	-2.03304	-0.990274	-1.40528	0.0959523	-0.0400567	0.094734	0.164302
38.2	0.532203	1.74802	-5.27832	6.70895										-2.44753	-1.89425	-0.605441	-1.1594	-0.0716208	-0.441838	0.121848	0.25413
38.3	1.0205	1.74802	-3.32522	6.22075										-2.13086	-1.51792	-1.30838	-1.07622	0.0335341	-0.343317	0.299838	0.50103
38.4	2.4853	3.70122	-2.83692	6.22075
38.5	2.4853	3.70122	-3.81352	5.73245
38.6	-0.444297	3.70122	-3.32522	6.70895
38.7	-1.9092	2.72462	-3.32522	7.19725
38.8	-0.444297	1.74802	-1.86032	7.19725
38.9	-0.932597	1.25972	-2.34862	6.22075
39	0.043903	1.25972	-2.83692	5.24415
39.1	0.532203	2.23632	-2.34862	4.26755
39.2	1.9971	1.74802	-2.83692	4.26755
39.3	0.043903	1.74802	-3.81352	4.26755
39.4	0.043903	2.23632	-3.32522	5.24415
39.5	-0.444297	3.21292	-2.83692	6.70895
39.6	-1.9092	0.283221	-2.34862	8.17385
39.7	0.043903	2.23632	-2.34862	6.22075
39.8	0.043903	2.72462	-3.32522	5.24415
39.9	-0.444297	2.23632	-3.32522	6.22075
40	-1.4209	1.25972	-1.37212	5.73245
40.1	-1.4209	3.21292	-1.37212	5.73245
40.2	0.532203	3.21292	-0.883818	5.24415
40.3	1.9971	2.72462	-2.34862	5.24415
40.4	0.043903	2.72462	-3.81352	4.75585
40.5	-0.444297	4.18942	-3.32522	4.26755
40.6	0.043903	1.74802	-2.34862	5.24415
40.7	0.043903	0.283221	-1.86032	6.70895
40.8	0.043903	0.771521	-2.34862	6.22075
40.9	0.043903	0.283221	-3.81352	5.24415
41	0.043903	1.25972	-2.34862	4.75585
41.1	-0.932597	2.72462	-2.34862	4.26755
41.2	-0.932597	1.74802	-0.883818	6.22075
41.3	-1.4209	2.23632	-0.395518	6.22075
41.4	-0.444297	3.21292	-2.34862	6.70895
41.5	-0.444297	2.72462	-2.34862	5.73245
41.6	0.532203	2.72462	-1.37212	4.75585
41.7	-0.932597	1.74802	-0.883818	5.73245
41.8	-0.444297	2.23632	-1.37212	5.73245
41.9	-0.444297	1.74802	-1.37212	5.24415
42	-0.444297	1.25972	-2.34862	7.19725
42.1	0.043903	1.25972	-2.83692	6.22075
42.2	1.5088	-0.693379	-2.34862	5.24415
42.3	1.9971	0.283221	-1.37212	4.75585
42.4	1.5088	0.771521	-0.883818	5.73245
42.5	1.9971	1.25972	-0.883818	5.24415
42.6	1.9971	2.72462	-1.86032	6.22075
42.7	1.0205	0.771521	-1.37212	8.17385
42.8	1.5088	0.771521	-0.395518	7.19725
42.9	0.532203	2.23632	-0.395518	5.73245
43	-0.932597	2.72462	-0.395518	5.24415
43.1	1.5088	4.18942	-1.37212	4.26755
43.2	1.9971	1.74802	-2.34862	4.75585
43.3	1.9971	2.23632	-1.37212	6.22075
43.4	0.532203	2.23632	-0.395518	7.68555
43.5	0.532203	3.21292	0.092782	6.70895
43.6	0.043903	1.74802	0.092782	6.70895
43.7	-0.444297	1.25972	-1.86032	7.68555
43.8	-0.444297	1.74802	-2.83692	6.22075
43.9	-0.444297	2.23632	-1.37212	6.70895
44	-0.444297	2.72462	-0.883818	5.24415
44.1	-1.4209	1.74802	-1.37212	5.73245
44.2	0.532203	2.23632	-1.37212	6.22075
44.3	1.5088	0.771521	-1.37212	5.24415
44.4	0.532203	-0.205079	-1.86032	5.73245
44.5	0.532203	2.23632	-0.883818	5.73245
44.6	0.532203	3.21292	0.092782	5.73245
44.7	1.5088	2.23632	-0.395518	6.22075
44.8	1.9971	2.23632	-1.86032	6.22075
44.9	0.532203	1.74802	-2.34862	6.22075
45	-1.4209	0.283221	-1.37212	6.22075
45.1	0.043903	1.25972	-0.883818	5.24415
45.2	-1.9092	3.70122	0.092782	5.24415
45.3	-2.3975	3.70122	0.581082	6.22075
45.4	0.043903	2.23632	1.06938	6.70895
45.5	-0.444297	1.25972	-0.395518	6.22075
45.6	0.043903	1.25972	-2.34862	5.24415
45.7	-0.444297	1.74802	-2.34862	5.73245
45.8	-0.444297	2.72462	-1.86032	5.24415
45.9	-0.932597	3.70122	-1.86032	5.73245
46	-0.932597	0.771521	-1.86032	6.70895
46.1	-1.9092	0.771521	-1.86032	6.22075
46.2	0.043903	1.74802	0.092782	4.26755
46.3	-0.932597	3.70122	0.092782	4.26755
46.4	1.0205	2.72462	1.06938	5.24415
46.5	0.532203	1.74802	0.092782	6.22075
46.6	-0.444297	1.25972	-0.883818	6.22075
46.7	1.0205	1.74802	0.581082	5.73245
46.8	1.0205	2.23632	0.092782	5.73245
46.9	0.532203	2.23632	-0.883818	6.22075
47	0.532203	1.74802	-2.83692	6.70895
47.1	1.9971	3.70122	-2.34862	7.68555
47.2	1.0205	2.72462	-0.395518	7.68555
47.3	-0.932597	1.74802	-0.395518	6.70895
47.4	-0.444297	1.25972	-0.395518	4.75585
47.5	1.0205	1.25972	-1.37212	3.77925
47.6	1.0205	3.70122	-0.883818	6.22075
47.7	0.532203	4.18942	-0.395518	6.70895
47.8	0.043903	2.23632	0.092782	5.73245
47.9	0.043903	1.25972	-1.37212	7.19725
48	-0.444297	-1.18168	-1.37212	6.70895
48.1	-0.444297	-0.693379	-0.395518	5.73245
48.2	1.0205	-0.205079	-0.883818	5.24415
48.3	0.532203	1.74802	0.092782	6.22075
48.4	0.532203	1.25972	0.092782	6.22075
48.5	-0.444297	-0.205079	0.092782	5.73245
48.6	0.532203	0.283221	-0.883818	5.24415
48.7	1.5088	0.771521	-0.395518	4.75585
48.8	2.4853	1.74802	0.581082	6.22075
48.9	1.0205	-1.18168	-1.37212	7.19725
49	0.043903	0.283221	-0.883818	6.22075
49.1	0.043903	0.283221	1.06938	4.75585
49.2	-0.444297	0.771521	0.092782	5.24415
49.3	1.5088	-0.693379	0.092782	4.75585
49.4	1.5088	-2.15818	0.581082	5.24415
49.5	0.043903	-1.18168	0.092782	6.22075
49.6	0.043903	-0.205079	0.092782	7.19725
49.7	0.043903	0.283221	0.092782	8.17385
49.8	1.0205	0.771521	-0.883818	6.22075
49.9	0.043903	-0.205079	-1.37212	6.22075
50	0.532203	0.283221	-0.395518	5.24415
50.1	1.0205	0.283221	2.04588	5.24415
50.2	-101.03	-101.768	-93.6573	-91.436
50.3	-322.71	-321.983	-307.524	-301.885
50.4	-362.749	-358.604	-348.051	-342.412
50.5	-320.268	-318.565	-308.989	-304.326
50.6	-290.972	-289.268	-279.204	-273.076
50.7	-272.417	-270.713	-260.161	-254.033
50.8	-255.327	-255.577	-246.001	-239.385
50.9	-242.143	-242.393	-234.282	-225.225
51	-230.913	-229.698	-223.051	-215.459
51.1	-222.124	-219.444	-212.798	-208.623
51.2	-212.847	-210.655	-205.473	-199.834
51.3	-204.546	-202.842	-198.149	-192.998
51.4	-195.757	-195.518	-189.848	-185.186
51.5	-188.433	-188.194	-183.012	-177.861
51.6	-182.573	-180.87	-177.641	-171.025
51.7	-176.714	-174.034	-170.805	-164.678
51.8	-171.343	-169.151	-166.899	-158.818
51.9	-165.483	-165.245	-161.04	-154.424
52	-161.089	-158.897	-156.157	-150.518
52.1	-154.253	-154.014	-151.762	-145.147
52.2	-148.882	-148.643	-146.391	-140.752
52.3	-144.487	-142.784	-141.02	-136.846
52.4	-139.604	-139.366	-136.137	-134.404
52.5	-134.722	-135.459	-133.696	-130.498
52.6	-131.792	-132.53	-129.79	-124.639
52.7	-127.397	-127.159	-125.395	-120.732
52.8	-124.468	-121.788	-121.001	-118.291
52.9	-121.05	-118.37	-118.071	-114.873
53	-117.143	-115.44	-115.63	-110.967
53.1	-114.214	-114.463	-112.7	-107.061
53.2	-109.819	-110.069	-110.258	-104.131
53.3	-103.96	-106.163	-107.329	-100.713
53.4	-103.96	-102.745	-103.423	-97.295
53.5	-102.007	-100.303	-100.981	-95.83
53.6	-99.0771	-98.3496	-99.5163	-94.365
53.7	-95.6591	-93.4666	-97.0753	-92.412
53.8	-93.7061	-92.4906	-94.1453	-88.506
53.9	-90.7761	-90.5376	-91.7043	-84.6
54	-89.3111	-88.0956	-88.2863	-83.135
54.1	-87.3581	-86.6306	-84.8683	-81.67
54.2	-85.4051	-85.6546	-84.3803	-80.205
54.3	-83.4521	-81.7476	-81.9383	-77.764
54.4	-79.0576	-79.3066	-79.0083	-75.811
54.5	-78.0811	-77.3536	-78.5203	-73.369
54.6	-77.1045	-74.9121	-74.6143	-70.439
54.7	-76.1279	-72.959	-73.6377	-68.4864
54.8	-72.2217	-71.0059	-71.6845	-67.9981
54.9	-70.7569	-69.0528	-70.708	-66.5332
55	-69.292	-66.6114	-69.2431	-64.5801
55.1	-68.8037	-66.1231	-67.29	-64.0918
55.2	-65.3858	-64.1699	-66.3135	-62.1387
55.3	-65.3858	-64.1699	-64.3603	-59.6973
55.4	-63.9209	-61.7285	-64.3603	-57.2559
55.5	-62.4561	-60.752	-64.3603	-56.2793
55.6	-61.9678	-59.7754	-60.9424	-55.3028
55.7	-60.0147	-58.3106	-59.4775	-54.3262
55.8	-57.5733	-55.3809	-58.9892	-53.3497
55.9	-56.5967	-54.4043	-57.5244	-53.8379
56	-57.085	-53.916	-57.0361	-52.3731
56.1	-56.5967	-53.4278	-55.5713	-50.42
56.2	-54.1553	-51.4746	-55.083	-50.42
56.3	-51.2256	-50.9864	-54.5947	-49.9317
56.4	-50.7373	-49.5215	-52.1533	-49.9317
56.5	-50.7373	-46.1035	-52.6416	-47.4903
56.6	-50.249	-45.127	-52.6416	-45.5372
56.7	-48.2959	-46.5918	-51.665	-46.0254
56.8	-48.7842	-45.6153	-50.2002	-44.5606
56.9	-47.8076	-45.6153	-49.2236	-44.0723
57	-45.3662	-42.1973	-47.2705	-43.584
57.1	-45.3662	-42.1973	-46.2939	-41.6309
57.2	-43.9014	-43.6621	-46.2939	-41.1426
57.3	-42.9248	-41.709	-45.3174	-40.1661
57.4	-42.9248	-41.2207	-44.3408	-38.2129
57.5	-41.9483	-38.7793	-43.8525	-37.7247
57.6	-40.4834	-39.7559	-42.876	-37.7247
57.7	-39.9951	-39.2676	-41.8994	-37.2364
57.8	-39.5069	-37.8028	-40.9228	-37.7247
57.9	-38.042	-37.3145	-39.9463	-35.7715
58	-39.5069	-37.3145	-40.9228	-35.7715
58.1	-39.0186	-36.8262	-41.4111	-35.2832
58.2	-41.46	-34.8731	-40.4345	-32.8418
58.3	-38.042	-33.8965	-39.9463	-32.3536
58.4	-36.5772	-35.3614	-40.4345	-33.3301
58.5	-36.0889	-36.3379	-39.9463	-32.3536
58.6	-37.0654	-35.3614	-40.4345	-31.377
58.7	-36.0889	-32.9199	-41.4111	-31.8653
58.8	-36.5772	-32.4317	-41.8994	-32.3536
58.9	-34.624	-33.4082	-40.4345	-32.8418
59	-34.624	-33.8965	-39.9463	-30.8887
59.1	-34.624	-32.4317	-39.9463	-29.9122
59.2	-33.6475	-31.4551	-39.9463	-28.9356
59.3	-33.6475	-29.9903	-40.4345	-27.959
59.4	-33.1592	-30.4785	-40.9228	-27.4708
59.5	-32.1826	-29.9903	-39.9463	-27.959
59.6	-32.6709	-30.9668	-39.9463	-28.9356
59.7	-32.1826	-31.9434	-39.9463	-27.959
59.8	-31.2061	-31.4551	-39.458	-27.4708
59.9	-30.7178	-30.9668	-39.458	-26.4942
60	-32.6709	-29.9903	-38.9697	-25.5176
60.1	-32.6709	-29.0137	-38.9697	-24.5411
60.2	-31.2061	-26.084	-39.9463	-25.5176
60.3	-31.2061	-26.084	-40.4345	-25.0293
60.4	-30.2295	-29.0137	-38.4814	-25.0293
60.5	-30.7178	-29.9903	-38.4814	-23.5645
60.6	-32.6709	-27.0606	-39.458	-23.5645
60.7	-34.624	-26.084	-39.458	-23.5645
60.8	-36.0889	-25.1074	-39.9463	-25.0293
60.9	-37.0654	-24.1309	-37.0166	-24.0528
61	-37.0654	-26.084	-36.04	-23.0762
61.1	-39.5069	-26.5723	-37.0166	-22.0997
61.2	-39.5069	-26.5723	-37.9931	-20.6348
61.3	-39.0186	-26.084	-37.0166	-21.1231
61.4	-36.5772	-25.5957	-37.5049	-22.0997
61.5	-38.042	-25.5957	-37.5049	-22.0997
61.6	-38.5303	-25.1074	-37.0166	-21.6114
61.7	-38.042	-23.1543	-35.0635	-21.6114
61.8	-37.0654	-26.084	-36.5283	-21.6114
61.9	-37.5537	-24.6192	-36.5283	-21.6114
62	-37.0654	-24.6192	-36.5283	-20.1465
62.1	-36.0889	-25.1074	-34.0869	-20.1465
62.2	-36.0889	-26.5723	-33.5986	-20.6348
62.3	-36.0889	-23.6426	-36.5283	-21.1231
62.4	-37.5537	-24.1309	-35.0635	-20.6348
62.5	-36.5772	-25.1074	-34.5752	-19.6582
62.6	-35.6006	-25.1074	-35.5517	-18.6817
62.7	-34.1358	-24.1309	-33.5986	-18.6817
62.8	-33.6475	-24.6192	-33.5986	-18.6817
62.9	-33.6475	-23.1543	-33.5986	-19.17
63	-32.6709	-23.6426	-32.1338	-18.6817
63.1	-31.2061	-23.1543	-33.5986	-18.6817
63.2	-33.1592	-22.666	-31.6455	-18.1934
63.3	-32.1826	-22.1778	-32.6221	-18.1934
63.4	-32.6709	-22.1778	-31.6455	-17.7051
63.5	-33.6475	-21.6895	-30.6689	-17.2168
63.6	-32.6709	-21.2012	-32.6221	-18.1934
63.7	-31.2061	-20.2246	-32.1338	-18.1934
63.8	-34.624	-21.6895	-31.6455	-18.6817
63.9	-38.042	-22.1778	-31.1572	-18.1934
64	-38.5303	-22.666	-29.6924	-15.752
64.1	-38.5303	-20.7129	-29.6924	-14.2872
64.2	-36.0889	-22.1778	-29.6924	-14.7754
64.3	-37.5537	-21.2012	-29.2041	-16.7286
64.4	-38.042	-21.2012	-28.7158	-18.6817
64.5	-39.5069	-21.2012	-30.1806	-17.2168
64.6	-39.0186	-20.2246	-30.6689	-15.2637
64.7	-38.042	-20.7129	-31.1572	-16.2403
64.8	-38.5303	-19.2481	-30.6689	-16.7286
64.9	-38.5303	-17.7832	-31.1572	-17.7051
65	-37.5537	-17.7832	-29.2041	-16.2403
65.1	-38.5303	-19.2481	-29.2041	-14.7754
65.2	-39.5069	-19.2481	-31.6455	-15.2637
65.3	-38.042	-19.2481	-31.6455	-15.752
65.4	-38.042	-19.7364	-31.6455	-16.2403
65.5	-37.0654	-18.7598	-31.1572	-14.7754
65.6	-36.0889	-19.2481	-29.2041	-15.752
65.7	-34.624	-19.7364	-27.7392	-16.2403
65.8	-34.624	-18.7598	-28.2275	-14.2872
65.9	-37.0654	-17.7832	-28.7158	-15.2637
66	-36.0889	-17.2949	-29.6924	-16.2403
66.1	-35.6006	-18.7598	-28.7158	-16.7286
66.2	-35.6006	-18.7598	-28.7158	-15.2637
66.3	-33.6475	-18.2715	-27.7392	-14.2872
66.4	-36.5772	-19.2481	-25.7861	-13.7989
66.5	-35.1123	-19.7364	-25.7861	-13.3106
66.6	-32.1826	-17.2949	-27.251	-14.7754
66.7	-34.1358	-17.2949	-27.7392	-15.752
66.8	-35.6006	-18.2715	-26.7627	-16.2403
66.9	-33.6475	-17.7832	-26.2744	-14.2872
67	-31.6943	-18.2715	-25.2978	-13.3106
67.1	-31.2061	-17.7832	-24.8095	-14.7754
67.2	-31.6943	-17.7832	-26.2744	-15.2637
67.3	-32.6709	-17.7832	-26.7627	-14.2872
67.4	-32.6709	-17.2949	-25.7861	-14.2872
67.5	-30.2295	-18.7598	-25.2978	-13.3106
67.6	-30.2295	-18.2715	-26.2744	-14.2872
67.7	-31.2061	-16.8067	-24.3213	-13.7989
67.8	-31.6943	-16.3184	-24.8095	-14.2872
67.9	-31.6943	-17.7832	-23.3447	-14.7754
68	-32.6709	-16.8067	-22.8564	-14.2872
68.1	-32.6709	-17.2949	-22.8564	-13.3106
68.2	-32.6709	-17.7832	-22.8564	-14.2872
68.3	-30.7178	-17.2949	-23.3447	-15.752
68.4	-30.2295	-15.3418	-22.8564	-14.2872
68.5	-29.7412	-16.3184	-23.3447	-12.8223
68.6	-31.2061	-15.3418	-22.8564	-13.7989
68.7	-29.7412	-14.8535	-22.8564	-14.7754
68.8	-28.7647	-16.3184	-24.3213	-13.7989
68.9	-27.2998	-17.7832	-24.8095	-12.8223
69	-27.7881	-17.2949	-23.833	-11.3575
69.1	-27.7881	-16.3184	-23.833	-12.8223
69.2	-26.8115	-14.8535	-23.3447	-12.8223
69.3	-25.3467	-12.9004	-21.8799	-11.8458
69.4	-25.835	-16.3184	-22.8564	-12.334
69.5	-26.8115	-16.3184	-23.3447	-12.8223
69.6	-26.8115	-15.8301	-23.833	-12.8223
69.7	-23.8819	-15.8301	-23.833	-14.7754
69.8	-23.8819	-15.8301	-20.9033	-15.2637
69.9	-22.9053	-15.8301	-21.3916	-13.3106
70	-23.3936	-19.2481	-21.3916	-11.3575
70.1	-25.835	-16.3184	-22.8564	-12.334
70.2	-25.3467	-15.8301	-22.3681	-12.8223
70.3	-26.3233	-14.8535	-20.9033	-13.3106
70.4	-24.8584	-17.2949	-21.8799	-11.3575
70.5	-23.3936	-16.8067	-21.8799	-10.3809
70.6	-22.9053	-15.3418	-21.8799	-11.3575
70.7	-23.3936	-16.8067	-21.8799	-12.8223
70.8	-23.3936	-17.2949	-21.8799	-13.3106
70.9	-24.3701	-17.7832	-21.8799	-12.334
71	-22.417	-15.3418	-20.415	-11.8458
71.1	-21.9287	-14.3653	-18.9502	-13.3106
71.2	-23.8819	-16.3184	-19.4385	-12.8223
71.3	-23.8819	-15.3418	-19.9267	-12.8223
71.4	-20.9522	-14.8535	-19.4385	-11.3575
71.5	-21.9287	-17.7832	-18.9502	-11.8458
71.6	-22.9053	-17.2949	-19.4385	-12.334
71.7	-19.9756	-15.3418	-19.9267	-12.334
71.8	-21.4404	-15.8301	-20.415	-10.3809
71.9	-22.9053	-16.8067	-20.415	-10.8692
72	-21.9287	-16.8067	-19.4385	-10.3809
72.1	-22.9053	-16.3184	-20.9033	-10.3809
72.2	-22.417	-18.2715	-19.4385	-13.3106
72.3	-22.417	-15.3418	-18.9502	-14.2872
72.4	-22.9053	-14.3653	-18.9502	-14.2872
72.5	-21.9287	-14.8535	-18.4619	-12.334
72.6	-20.9522	-14.8535	-18.4619	-11.8458
72.7	-19.9756	-15.3418	-19.9267	-13.7989
72.8	-20.9522	-15.3418	-20.415	-11.3575
72.9	-20.4639	-14.8535	-20.415	-11.3575
73	-20.9522	-14.8535	-20.415	-10.8692
73.1	-20.4639	-16.3184	-21.3916	-10.8692
73.2	-19.4873	-14.8535	-20.9033	-9.89255
73.3	-19.9756	-15.8301	-20.9033	-9.89255
73.4	-20.4639	-15.3418	-18.4619	-9.89255
73.5	-21.9287	-15.3418	-17.4853	-9.40425
73.6	-20.9522	-13.877	-17.9736	-11.3575
73.7	-18.5108	-15.8301	-18.4619	-12.334
73.8	-18.999	-14.8535	-19.9267	-11.8458
73.9	-19.4873	-14.3653	-19.4385	-10.8692
74	-21.4404	-13.877	-18.9502	-10.3809
74.1	-19.9756	-14.8535	-18.4619	-11.3575
74.2	-18.5108	-16.3184	-18.9502	-10.8692
74.3	-19.4873	-15.3418	-18.4619	-11.3575
74.4	-18.5108	-12.9004	-17.4853	-10.8692
74.5	-17.5342	-13.3887	-18.9502	-10.8692
74.6	-18.5108	-16.8067	-18.9502	-11.8458
74.7	-18.999	-16.3184	-18.4619	-12.334
74.8	-18.5108	-14.3653	-18.4619	-11.3575
74.9	-18.5108	-14.3653	-16.9971	-10.3809
75	-19.4873	-13.3887	-17.9736	-11.8458
75.1	-18.5108	-15.8301	-17.9736	-10.3809
75.2	-18.5108	-15.8301	-18.4619	-10.3809
75.3	-18.999	-15.3418	-17.9736	-10.3809
75.4	-18.999	-13.3887	-16.5088	-11.3575
75.5	-18.999	-14.3653	-17.9736	-11.8458
75.6	-19.9756	-15.3418	-18.4619	-11.8458
75.7	-18.5108	-14.3653	-17.9736	-11.3575
75.8	-18.5108	-12.4121	-18.4619	-11.8458
75.9	-18.5108	-14.8535	-19.4385	-11.8458
76	-20.4639	-14.8535	-17.9736	-12.8223
76.1	-18.0225	-13.877	-16.5088	-11.8458
76.2	-18.999	-14.8535	-15.5322	-11.3575
76.3	-18.5108	-14.3653	-17.4853	-9.89255
76.4	-17.0459	-14.3653	-17.4853	-9.89255
76.5	-15.0928	-14.3653	-18.4619	-9.89255
76.6	-16.5576	-13.3887	-18.4619	-10.3809
76.7	-18.0225	-13.877	-17.4853	-10.3809
76.8	-18.999	-15.3418	-16.9971	-10.3809
76.9	-18.0225	-14.3653	-15.5322	-12.334
77	-17.5342	-13.3887	-15.5322	-11.3575
77.1	-17.5342	-14.8535	-16.9971	-11.3575
77.2	-18.0225	-15.8301	-16.5088	-12.8223
77.3	-17.5342	-14.3653	-16.5088	-12.334
77.4	-17.5342	-14.3653	-16.0205	-10.3809
77.5	-18.5108	-13.3887	-16.5088	-10.3809
77.6	-17.0459	-14.3653	-17.4853	-10.8692
77.7	-16.5576	-14.3653	-17.4853	-11.3575
77.8	-18.999	-11.9238	-16.0205	-10.8692
77.9	-17.5342	-13.3887	-16.9971	-9.89255
78	-17.5342	-14.3653	-17.9736	-10.8692
78.1	-17.0459	-13.877	-16.5088	-9.89255
78.2	-16.5576	-12.9004	-16.9971	-9.89255
78.3	-15.0928	-11.4356	-17.4853	-10.8692
78.4	-16.0693	-10.9473	-16.5088	-11.3575
78.5	-15.0928	-14.3653	-16.9971	-11.3575
78.6	-15.5811	-14.3653	-16.5088	-10.8692
78.7	-17.5342	-12.4121	-15.5322	-10.8692
78.8	-17.5342	-13.3887	-16.0205	-10.8692
78.9	-17.0459	-13.877	-17.9736	-9.89255
79	-17.0459	-13.3887	-16.5088	-10.8692
79.1	-18.0225	-11.9238	-15.0439	-11.3575
79.2	-16.5576	-14.3653	-15.5322	-10.8692
79.3	-15.5811	-13.3887	-16.0205	-10.8692
79.4	-16.5576	-13.877	-16.0205	-8.91605
79.5	-18.0225	-12.9004	-15.5322	-8.91605
79.6	-16.0693	-12.4121	-15.5322	-10.3809
79.7	-15.0928	-10.9473	-15.5322	-10.8692
79.8	-16.5576	-11.4356	-15.0439	-10.8692
79.9	-16.5576	-12.9004	-16.0205	-10.3809
80	-15.0928	-13.877	-16.5088	-10.8692
80.1	-15.0928	-14.3653	-15.5322	-12.334
80.2	-17.0459	-15.3418	-16.5088	-12.334
80.3	-16.5576	-14.8535	-17.4853	-11.3575
80.4	-14.1162	-12.9004	-16.5088	-9.40425
80.5	-16.0693	-13.3887	-15.5322	-10.8692
80.6	-17.0459	-12.9004	-16.9971	-12.8223
80.7	-17.0459	-13.3887	-17.9736	-11.3575
80.8	-17.0459	-14.8535	-16.9971	-10.3809
80.9	-15.5811	-15.8301	-16.5088	-11.8458
81	-18.0225	-14.3653	-17.9736	-10.8692
81.1	-17.5342	-14.8535	-17.4853	-11.8458
81.2	-17.0459	-15.8301	-16.5088	-11.8458
81.3	-16.0693	-15.3418	-15.0439	-10.8692
81.4	-15.5811	-15.3418	-15.0439	-12.334
81.5	-15.5811	-14.3653	-16.5088	-11.8458
81.6	-18.0225	-14.3653	-16.9971	-12.334
81.7	-16.5576	-15.8301	-16.0205	-12.334
81.8	-15.0928	-15.3418	-16.5088	-11.3575
81.9	-16.0693	-16.8067	-16.5088	-11.8458
82	-17.5342	-15.8301	-16.9971	-11.3575
82.1	-17.0459	-14.8535	-16.5088	-10.8692
82.2	-17.5342	-14.8535	-16.0205	-11.8458
82.3	-16.0693	-17.2949	-15.5322	-12.8223
82.4	-17.5342	-20.2246	-15.5322	-11.8458
82.5	-17.0459	-21.6895	-15.0439	-11.8458
82.6	-16.0693	-21.6895	-16.5088	-10.3809
82.7	-15.0928	-22.666	-16.9971	-10.3809
82.8	-15.5811	-24.1309	-16.9971	-10.3809
82.9	-15.5811	-24.6192	-16.5088	-10.3809
83	-16.5576	-22.666	-16.5088	-10.3809
83.1	-17.0459	-21.2012	-15.5322	-9.89255
83.2	-17.0459	-22.1778	-16.9971	-10.3809
83.3	-14.1162	-23.1543	-16.9971	-10.8692
83.4	-14.6045	-24.6192	-14.5556	-9.89255
83.5	-16.0693	-24.1309	-15.5322	-8.42775
83.6	-15.5811	-24.1309	-16.5088	-8.42775
83.7	-15.0928	-24.1309	-16.5088	-9.40425
83.8	-14.6045	-25.5957	-16.0205	-8.91605
83.9	-15.0928	-24.6192	-16.9971	-9.89255
84	-13.6279	-22.1778	-16.5088	-10.8692
84.1	-15.0928	-23.6426	-16.0205	-11.3575
84.2	-17.0459	-24.1309	-16.5088	-12.8223
84.3	-16.0693	-24.6192	-16.9971	-11.3575
84.4	-16.0693	-24.6192	-16.9971	-10.8692
84.5	-17.0459	-23.1543	-16.5088	-10.3809
84.6	-17.0459	-21.2012	-16.5088	-10.3809
84.7	-14.6045	-22.666	-16.0205	-11.8458
84.8	-14.1162	-22.1778	-16.0205	-11.8458
84.9	-15.5811	-21.6895	-15.0439	-11.3575
85	-15.0928	-23.1543	-17.4853	-10.3809
85.1	-15.5811	-22.1778	-16.5088	-10.3809
85.2	-16.5576	-22.1778	-16.0205	-10.8692
85.3	-16.5576	-22.666	-15.5322	-11.8458
85.4	-16.5576	-22.666	-15.5322	-11.8458
85.5	-17.5342	-22.1778	-15.5322	-10.8692
85.6	-16.0693	-25.1074	-16.0205	-10.3809
85.7	-15.5811	-25.1074	-16.9971	-10.8692
85.8	-17.0459	-23.1543	-16.5088	-9.89255
85.9	-16.5576	-21.2012	-16.9971	-8.91605
86	-16.5576	-22.666	-16.5088	-9.89255
86.1	-15.5811	-23.1543	-17.4853	-10.3809
86.2	-15.0928	-22.1778	-16.9971	-10.3809
86.3	-15.5811	-21.6895	-16.0205	-12.334
86.4	-15.5811	-23.1543	-15.0439	-11.3575
86.5	-17.5342	-22.666	-16.0205	-10.3809
86.6	-14.1162	-22.1778	-14.5556	-9.89255
86.7	-15.5811	-20.7129	-15.0439	-11.8458
86.8	-16.0693	-19.7364	-15.5322	-10.3809
86.9	-14.6045	-19.7364	-15.0439	-11.3575
87	-14.1162	-18.7598	-15.0439	-10.8692
87.1	-15.5811	-19.7364	-15.0439	-8.91605
87.2	-17.5342	-20.7129	-14.5556	-8.91605
87.3	-17.0459	-22.1778	-14.5556	-9.89255
87.4	-14.6045	-21.2012	-15.0439	-11.3575
87.5	-16.5576	-18.2715	-14.0674	-10.3809
87.6	-17.0459	-18.2715	-15.0439	-9.89255
87.7	-16.0693	-19.2481	-15.5322	-10.8692
87.8	-16.0693	-20.2246	-16.5088	-11.8458
87.9	-15.5811	-21.2012	-16.9971	-10.8692
88	-15.0928	-19.7364	-16.0205	-10.8692
88.1	-15.0928	-19.2481	-15.0439	-8.42775
88.2	-17.0459	-19.2481	-15.5322	-8.91605
88.3	-15.5811	-18.7598	-15.5322	-9.89255
88.4	-15.0928	-18.2715	-15.5322	-9.40425
88.5	-16.5576	-18.2715	-14.5556	-7.93945
88.6	-15.5811	-18.7598	-15.0439	-9.40425
88.7	-15.0928	-20.2246	-15.0439	-9.40425
88.8	-15.5811	-18.2715	-13.0908	-9.40425
88.9	-15.5811	-16.3184	-13.5791	-7.93945
89	-17.0459	-18.7598	-15.0439	-6.96285
89.1	-15.5811	-18.2715	-15.0439	-8.91605
89.2	-14.1162	-18.7598	-14.5556	-8.91605
89.3	-14.1162	-19.7364	-16.0205	-9.89255
89.4	-17.5342	-21.2012	-16.5088	-10.3809
89.5	-16.0693	-18.2715	-14.0674	-8.42775
89.6	-16.0693	-17.7832	-14.5556	-10.3809
89.7	-16.0693	-17.7832	-14.5556	-10.8692
89.8	-18.0225	-17.7832	-15.0439	-9.89255
89.9	-18.0225	-16.8067	-15.5322	-9.40425
90	-16.5576	-17.7832	-14.5556	-9.40425
90.1	-18.0225	-16.3184	-13.5791	-10.3809
90.2	-18.0225	-16.8067	-13.5791	-10.8692
90.3	-16.0693	-16.8067	-14.5556	-9.89255
90.4	-14.1162	-15.8301	-16.5088	-10.8692
90.5	-14.6045	-15.8301	-16.9971	-9.89255
90.6	-16.5576	-18.7598	-16.5088	-7.93945
90.7	-15.5811	-18.7598	-14.0674	-7.93945
90.8	-15.5811	-18.7598	-13.5791	-8.91605
90.9	-15.5811	-19.2481	-14.0674	-9.89255
91	-14.1162	-17.7832	-14.5556	-9.40425
91.1	-14.6045	-14.3653	-14.0674	-8.91605
91.2	-15.0928	-14.8535	-14.0674	-8.42775
91.3	-14.1162	-16.3184	-14.0674	-9.40425
91.4	-16.0693	-16.8067	-15.5322	-8.91605
91.5	-16.0693	-15.8301	-15.0439	-8.91605
91.6	-15.0928	-15.3418	-15.5322	-9.40425
91.7	-16.5576	-15.3418	-16.5088	-8.91605
91.8	-17.0459	-15.8301	-16.0205	-7.93945
91.9	-15.5811	-16.8067	-15.0439	-8.42775
92	-17.5342	-19.7364	-13.5791	-8.91605
92.1	-17.5342	-20.7129	-13.0908	-9.40425
92.2	-17.0459	-21.2012	-14.5556	-9.40425
92.3	-15.5811	-20.7129	-15.0439	-10.3809
92.4	-14.1162	-20.7129	-15.0439	-10.3809
92.5	-14.6045	-19.7364	-15.0439	-9.89255
92.6	-14.6045	-20.7129	-15.0439	-8.91605
92.7	-14.1162	-23.6426	-14.5556	-8.91605
92.8	-13.1397	-22.1778	-14.5556	-8.42775
92.9	-15.0928	-21.6895	-14.5556	-9.89255
93	-16.0693	-22.666	-16.0205	-11.3575
93.1	-15.5811	-22.1778	-16.5088	-10.3809
93.2	-15.5811	-22.666	-15.5322	-7.93945
93.3	-17.5342	-23.6426	-15.5322	-7.45115
93.4	-15.0928	-26.084	-15.0439	-7.93945
93.5	-14.6045	-25.1074	-13.5791	-9.40425
93.6	-14.6045	-24.6192	-13.0908	-8.91605
93.7	-13.1397	-24.1309	-14.5556	-7.93945
93.8	-13.1397	-24.1309	-15.0439	-7.45115
93.9	-14.6045	-24.6192	-15.0439	-7.93945
94	-14.6045	-24.1309	-14.5556	-9.40425
94.1	-14.1162	-24.6192	-15.5322	-9.40425
94.2	-14.6045	-25.5957	-15.5322	-10.8692
94.3	-14.1162	-24.6192	-15.0439	-11.8458
94.4	-14.6045	-25.1074	-14.0674	-12.334
94.5	-15.5811	-25.1074	-13.0908	-10.3809
94.6	-16.0693	-24.6192	-14.0674	-10.3809
94.7	-16.0693	-26.084	-13.0908	-10.8692
94.8	-15.0928	-27.0606	-15.5322	-11.3575
94.9	-15.0928	-25.1074	-15.0439	-11.3575
95	-13.6279	-25.5957	-13.5791	-11.3575
95.1	-13.6279	-25.1074	-15.5322	-11.3575
95.2	-15.5811	-24.1309	-14.5556	-10.3809
95.3	-14.1162	-21.6895	-13.0908	-11.3575
95.4	-13.1397	-21.6895	-13.5791	-11.8458
95.5	-14.1162	-23.1543	-14.0674	-12.334
95.6	-13.6279	-23.1543	-14.0674	-12.8223
95.7	-14.1162	-23.6426	-15.0439	-11.3575
95.8	-15.0928	-23.1543	-15.0439	-11.3575
95.9	-13.1397	-25.1074	-15.0439	-11.3575
96	-13.6279	-24.1309	-14.5556	-11.3575
96.1	-15.0928	-23.6426	-15.5322	-10.3809
96.2	-16.0693	-23.1543	-16.5088	-11.3575
96.3	-15.0928	-20.7129	-15.5322	-11.8458
96.4	-13.6279	-21.6895	-16.5088	-11.8458
96.5	-13.1397	-21.6895	-16.0205	-9.40425
96.6	-13.6279	-22.666	-15.0439	-9.89255
96.7	-15.0928	-22.1778	-15.0439	-9.89255
96.8	-16.0693	-21.2012	-16.0205	-10.8692
96.9	-15.0928	-21.6895	-15.5322	-11.3575
97	-12.6514	-21.6895	-16.0205	-10.8692
97.1	-13.6279	-20.7129	-16.9971	-11.8458
97.2	-15.0928	-19.7364	-17.4853	-10.8692
97.3	-15.5811	-19.2481	-17.9736	-10.3809
97.4	-15.5811	-20.2246	-16.0205	-10.3809
97.5	-13.6279	-20.7129	-16.0205	-10.8692
97.6	-16.0693	-20.7129	-16.9971	-9.89255
97.7	-15.5811	-21.2012	-15.5322	-9.40425
97.8	-13.6279	-19.2481	-14.5556	-10.3809
97.9	-13.6279	-19.2481	-16.0205	-9.40425
98	-15.5811	-19.7364	-16.9971	-8.42775
98.1	-16.0693	-19.7364	-15.5322	-9.89255
98.2	-16.0693	-20.7129	-16.0205	-10.3809
98.3	-14.6045	-20.2246	-15.5322	-9.89255
98.4	-12.6514	-21.2012	-16.0205	-10.8692
98.5	-12.6514	-21.2012	-15.5322	-10.8692
98.6	-13.1397	-19.7364	-15.0439	-9.89255
98.7	-13.6279	-20.2246	-15.0439	-9.89255
98.8	-13.6279	-20.7129	-15.0439	-10.8692
98.9	-15.0928	-22.666	-16.5088	-12.334
99	-16.0693	-18.7598	-16.9971	-11.8458
99.1	-17.0459	-18.2715	-15.0439	-10.3809
99.2	-15.5811	-18.2715	-15.0439	-8.42775
99.3	-14.6045	-18.7598	-15.0439	-8.42775
99.4	-16.5576	-19.7364	-16.0205	-8.91605
99.5	-18.5108	-19.2481	-16.5088	-9.89255
99.6	-18.0225	-18.7598	-16.0205	-12.334
99.7	-18.5108	-18.2715	-15.0439	-10.8692
99.8	-16.0693	-21.2012	-16.0205	-9.40425
99.9	-17.5342	-18.7598	-16.5088	-10.8692
100	-18.5108	-16.3184	-17.4853	-11.3575
100.1	-18.5108	-15.8301	-14.5556	-10.3809
100.2	115.278	115.518	111.421	113.643
100.3	319.868	318.154	305.757	309.443
100.4	340.376	338.173	328.218	333.857
100.5	297.896	298.134	288.667	294.795
100.6	270.552	270.302	260.835	265.986
100.7	252.974	252.236	243.745	246.943
100.8	239.302	236.123	228.609	234.248
100.9	225.63	222.939	217.378	221.064
101	213.423	213.662	208.101	211.299
101.1	203.169	204.384	197.359	202.998
101.2	194.868	194.13	189.058	195.674
101.3	187.544	186.806	180.757	188.35
101.4	179.732	180.459	175.386	180.049
101.5	171.919	173.134	168.062	171.748
101.6	165.083	165.81	161.714	166.377
101.7	159.712	158.486	155.855	161.982
101.8	153.853	153.115	150.484	155.635
101.9	148.482	147.744	145.113	150.752
102	143.11	142.861	140.718	145.869
102.1	138.228	138.955	135.835	140.986
102.2	133.345	133.584	131.441	137.568
102.3	127.485	128.212	126.07	131.709
102.4	123.091	121.865	122.651	126.826
102.5	118.696	116.494	118.257	124.873
102.6	114.79	114.053	114.839	120.967
102.7	111.372	111.611	110.444	116.572
102.8	108.442	107.705	108.491	112.178
102.9	104.048	105.264	103.608	109.248
103	100.142	99.8926	101.167	105.83
103.1	95.7471	99.8926	98.2373	101.924
103.2	92.8174	95.498	93.3545	97.5292
103.3	90.8642	92.0801	90.4248	95.0878
103.4	87.9346	87.1972	88.4717	92.1582
103.5	85.4931	83.7793	87.4951	90.205
103.6	81.5869	83.7793	85.0537	85.3222
103.7	79.1455	79.873	82.124	80.9277
103.8	77.6807	76.9433	80.1709	78.4863
103.9	76.7041	74.0136	77.7295	77.0214
104	73.7744	73.0371	74.3115	73.6035
104.1	70.3564	70.5957	71.3819	69.6972
104.2	67.915	68.6426	69.4287	66.2792
104.3	65.4736	67.1777	67.9639	64.8144
104.4	64.0088	64.7363	66.0108	62.8613
104.5	62.5439	62.7832	63.0811	60.4199
104.6	60.5908	60.8301	62.1045	57.4902
104.7	60.1025	59.8535	61.6162	56.0253
104.8	59.126	57.9004	61.1279	55.5371
104.9	56.6846	56.4355	57.71	54.0722
105	53.2666	54.4824	55.2686	51.1425
105.1	51.8017	53.9941	54.7803	49.1894
105.2	50.3369	52.5293	53.8037	45.7714
105.3	49.3603	50.5762	51.8506	45.7714
105.4	47.8955	49.5996	50.3858	46.2597
105.5	46.4307	47.1582	48.9209	41.8652
105.6	45.9424	45.6933	46.9678	40.4004
105.7	43.9892	45.6933	45.5029	39.9121
105.8	42.5244	46.1816	45.5029	38.4473
105.9	40.5713	43.7402	44.0381	36.9824
106	39.5947	40.8105	42.085	35.5176
106.1	39.5947	41.7871	41.5967	35.5176
106.2	39.5947	39.834	41.5967	36.0059
106.3	37.1533	39.834	40.6201	34.0527
106.4	35.2002	37.8808	39.6436	34.541
106.5	33.2471	37.3926	37.6905	32.5879
106.6	33.7353	35.9277	37.6905	29.6582
106.7	33.2471	34.9512	36.7139	28.1934
106.8	33.2471	33.9746	36.7139	28.1934
106.9	32.7588	32.998	34.7607	29.1699
107	29.8291	31.5332	33.2959	28.1934
107.1	29.8291	32.998	30.8545	26.7285
107.2	30.8057	32.0215	31.3428	25.752
107.3	29.3408	29.0918	31.3428	25.2637
107.4	27.876	30.0684	29.8779	24.7754
107.5	26.8994	29.0918	28.4131	25.752
107.6	26.4111	29.0918	28.4131	25.2637
107.7	24.458	27.627	26.9482	23.7988
107.8	24.9463	26.6504	27.9248	24.2871
107.9	24.458	26.6504	29.8779	23.7988
108	23.9697	25.6738	28.9014	21.8457
108.1	25.4346	26.1621	25.9717	20.8691
108.2	22.5049	25.6738	24.9951	21.8457
108.3	22.0166	25.6738	24.5068	21.3574
108.4	22.5049	24.6973	22.5537	21.3574
108.5	22.9932	23.7207	23.042	20.8691
108.6	22.9932	23.2324	23.5303	19.8925
108.7	22.0166	23.2324	22.5537	18.4277
108.8	22.0166	23.2324	21.5772	18.916
108.9	21.04	20.791	21.0889	18.916
109	19.0869	19.8145	21.5772	17.9394
109.1	19.0869	20.3027	21.5772	17.9394
109.2	18.5986	21.2793	21.0889	17.9394
109.3	17.1338	19.3262	21.0889	18.4277
109.4	16.6455	19.3262	18.6475	17.9394
109.5	16.6455	18.3496	19.1357	17.4511
109.6	17.1338	19.8145	19.1357	16.9628
109.7	16.6455	19.8145	17.6709	15.9863
109.8	15.6689	19.3262	16.2061	17.4511
109.9	15.1807	18.8379	18.6475	16.4746
110	15.6689	18.8379	18.1592	15.9863
110.1	16.1572	16.8848	17.6709	15.9863
110.2	15.6689	16.8848	16.6943	14.5214
110.3	16.1572	18.3496	16.6943	16.9628
110.4	14.2041	18.8379	16.2061	15.498
110.5	14.2041	17.373	14.7412	13.5449
110.6	14.2041	16.8848	15.2295	15.0097
110.7	12.7392	15.9082	14.7412	15.498
110.8	15.6689	16.3965	15.2295	14.5214
110.9	12.251	14.9316	15.7178	15.498
111	13.2275	13.9551	15.7178	15.498
111.1	13.7158	14.4434	14.7412	15.0097
111.2	13.2275	13.9551	14.2529	15.0097
111.3	12.251	13.4668	12.7881	15.9863
111.4	13.2275	15.9082	12.7881	15.0097
111.5	11.7627	16.3965	12.7881	15.9863
111.6	11.7627	13.9551	11.8115	16.4746
111.7	12.7392	13.4668	12.2998	15.9863
111.8	12.7392	13.4668	11.8115	15.9863
111.9	12.251	13.9551	11.8115	14.5214
112	10.7861	13.4668	11.3233	15.0097
112.1	9.80956	12.4902	12.2998	15.0097
112.2	10.7861	12.0019	13.2764	15.498
112.3	10.7861	12.9785	12.2998	14.0332
112.4	10.7861	13.9551	11.8115	13.0566
112.5	10.7861	14.9316	9.85838	13.0566
112.6	9.80956	15.4199	9.85838	13.0566
112.7	8.3447	12.9785	10.3467	13.0566
112.8	6.8799	11.0254	11.3233	13.0566
112.9	6.8799	11.5136	10.3467	12.5683
113	9.80956	12.0019	9.37008	12.5683
113.1	9.32128	13.4668	8.88188	12.08
113.2	10.2978	12.4902	9.85838	12.5683
113.3	10.7861	12.0019	10.3467	12.5683
113.4	9.80956	12.0019	9.85838	12.08
113.5	8.3447	11.5136	7.90528	12.5683
113.6	7.8564	10.5371	8.39358	11.1035
113.7	8.833	11.0254	9.85838	10.6152
113.8	9.80956	12.0019	9.85838	10.6152
113.9	8.3447	11.5136	9.85838	10.1269
114	7.8564	11.0254	8.88188	11.5918
114.1	6.3916	11.0254	7.90528	12.5683
114.2	8.3447	10.0488	9.37008	11.5918
114.3	8.833	10.0488	8.88188	12.5683
114.4	7.3681	10.5371	9.85838	12.08
114.5	6.3916	10.0488	8.39358	11.5918
114.6	6.8799	9.56052	6.44048	11.5918
114.7	7.3681	7.60742	6.44048	11.1035
114.8	6.8799	8.09572	7.90528	10.6152
114.9	8.833	10.0488	9.37008	11.5918
115	9.32128	8.58402	9.85838	11.1035
115.1	10.2978	9.07222	8.88188	10.1269
115.2	9.80956	9.56052	8.39358	10.6152
115.3	9.32128	8.58402	7.41698	10.1269
115.4	6.8799	9.07222	7.41698	10.6152
115.5	6.8799	10.0488	7.90528	11.1035
115.6	6.3916	9.56052	7.90528	11.1035
115.7	5.9033	8.09572	7.41698	11.5918
115.8	6.8799	7.60742	6.92868	13.0566
115.9	6.3916	7.60742	6.92868	11.5918
116	6.8799	8.58402	6.92868	10.6152
116.1	5.9033	9.07222	4.97558	11.1035
116.2	4.9267	10.0488	6.44048	10.6152
116.3	8.3447	12.0019	7.90528	9.63865
116.4	5.9033	11.0254	6.92868	9.63865
116.5	5.9033	9.56052	6.92868	10.1269
116.6	6.3916	8.58402	7.90528	10.1269
116.7	4.9267	8.09572	7.90528	9.63865
116.8	2.9736	6.63082	5.95218	9.15035
116.9	5.415	8.58402	5.46388	9.63865
117	6.8799	11.0254	5.46388	9.63865
117.1	7.3681	9.56052	5.95218	10.6152
117.2	4.9267	7.60742	5.95218	10.6152
117.3	3.9502	7.11912	6.44048	10.6152
117.4	5.9033	8.09572	8.39358	11.1035
117.5	5.9033	7.11912	6.92868	10.1269
117.6	5.9033	7.11912	5.95218	10.6152
117.7	6.3916	6.14262	6.92868	11.1035
117.8	6.3916	7.11912	6.92868	11.5918
117.9	4.9267	7.60742	3.99898	9.63865
118	5.415	7.60742	3.99898	10.1269
118.1	5.415	8.09572	7.41698	10.1269
118.2	4.9267	8.58402	7.90528	9.15035
118.3	3.9502	8.58402	7.41698	10.1269
118.4	4.4385	8.58402	5.95218	8.17385
118.5	6.8799	8.09572	4.97558	9.15035
118.6	5.9033	10.0488	5.95218	10.6152
118.7	4.4385	7.60742	4.97558	11.5918
118.8	2.9736	7.60742	6.44048	10.6152
118.9	4.4385	7.11912	6.92868	9.15035
119	6.3916	9.07222	4.97558	9.63865
119.1	4.4385	8.58402	5.95218	9.15035
119.2	2.9736	5.65432	5.95218	9.15035
119.3	3.9502	5.16602	5.95218	9.63865
119.4	4.4385	7.60742	6.44048	9.63865
119.5	4.4385	9.07222	5.46388	10.1269
119.6	4.9267	6.63082	5.46388	9.63865
119.7	5.9033	6.14262	5.95218	9.63865
119.8	4.4385	7.60742	4.48728	11.1035
119.9	2.9736	8.09572	4.97558	10.6152
120	2.4853	7.60742	4.97558	8.66215
120.1	2.9736	6.14262	4.48728	9.63865
120.2	3.9502	3.70122	5.46388	8.66215
120.3	4.4385	5.65432	4.48728	9.63865
120.4	2.9736	8.09572	4.48728	10.1269
120.5	1.0205	8.09572	4.97558	9.63865
120.6	2.9736	8.09572	5.46388	8.66215
120.7	4.4385	6.14262	6.92868	9.15035
120.8	3.4619	5.65432	5.95218	9.15035
120.9	4.9267	5.16602	5.95218	8.66215
121	4.4385	5.16602	5.95218	9.63865
121.1	2.9736	6.14262	5.46388	9.15035
121.2	1.9971	7.11912	5.95218	10.1269
121.3	2.4853	6.63082	4.48728	9.15035
121.4	3.9502	6.63082	3.51078	9.15035
121.5	3.4619	6.14262	2.04588	8.17385
121.6	3.9502	7.11912	3.02248	8.17385
121.7	5.415	6.14262	4.48728	10.1269
121.8	3.9502	6.14262	4.97558	10.1269
121.9	3.4619	5.65432	4.48728	10.1269
122	3.4619	6.14262	3.99898	10.6152
122.1	4.4385	8.58402	4.48728	9.63865
122.2	4.4385	6.14262	4.97558	8.17385
122.3	2.4853	6.14262	3.51078	8.17385
122.4	3.9502	7.60742	3.99898	9.15035
122.5	4.4385	8.58402	4.48728	9.15035
122.6	2.9736	7.11912	3.51078	7.19725
122.7	2.4853	5.16602	4.48728	7.68555
122.8	2.9736	5.65432	3.99898	9.63865
122.9	2.4853	5.65432	3.51078	10.1269
123	2.4853	6.63082	3.02248	9.15035
123.1	1.9971	5.16602	3.99898	9.63865
123.2	2.9736	5.65432	3.51078	10.6152
123.3	2.9736	6.14262	3.02248	7.68555
123.4	2.4853	6.14262	4.97558	7.19725
123.5	1.9971	5.16602	3.51078	8.17385
123.6	1.9971	5.16602	3.99898	8.17385
123.7	2.9736	5.65432	3.99898	8.66215
123.8	3.4619	7.60742	2.04588	8.66215
123.9	4.4385	7.60742	2.53418	8.66215
124	3.4619	7.60742	4.48728	8.66215
124.1	2.9736	7.11912	3.02248	8.66215
124.2	2.9736	7.11912	2.04588	9.15035
124.3	1.5088	7.11912	3.02248	9.15035
124.4	1.9971	8.09572	3.51078	8.17385
124.5	1.5088	6.63082	3.51078	6.70895
124.6	1.0205	5.16602	2.53418	7.19725
124.7	2.9736	4.67772	3.02248	8.66215
124.8	1.9971	7.11912	3.51078	10.1269
124.9	2.9736	7.11912	3.02248	9.63865
125	3.9502	5.65432	3.51078	8.66215
125.1	3.4619	4.18942	3.02248	8.17385
125.2	1.9971	5.65432	2.53418	9.63865
125.3	3.9502	4.67772	3.02248	10.1269
125.4	4.4385	7.11912	2.53418	8.66215
125.5	3.4619	8.09572	2.53418	9.15035
125.6	3.4619	6.63082	3.51078	8.17385
125.7	2.9736	4.18942	4.48728	7.68555
125.8	4.4385	6.14262	4.48728	7.19725
125.9	2.4853	6.63082	2.53418	8.17385
126	1.5088	5.16602	3.02248	8.66215
126.1	1.5088	4.67772	3.99898	8.17385
126.2	1.0205	5.16602	2.53418	8.66215
126.3	1.0205	6.14262	2.04588	8.17385
126.4	1.5088	6.14262	3.02248	6.70895
126.5	2.9736	7.11912	2.53418	8.17385
126.6	3.4619	6.14262	1.55758	9.15035
126.7	3.4619	4.67772	3.02248	7.19725
126.8	3.4619	5.65432	3.99898	7.68555
126.9	2.9736	7.11912	2.53418	8.17385
127	3.4619	6.63082	3.02248	8.17385
127.1	2.9736	5.65432	3.51078	7.68555
127.2	1.9971	7.11912	3.51078	7.68555
127.3	1.5088	5.16602	2.04588	8.66215
127.4	1.9971	6.63082	2.04588	7.68555
127.5	1.9971	8.09572	3.99898	7.19725
127.6	1.0205	7.11912	4.97558	7.19725
127.7	1.9971	6.63082	4.48728	8.66215
127.8	1.9971	5.65432	3.02248	7.68555
127.9	1.5088	6.14262	3.51078	8.17385
128	0.043903	6.63082	3.99898	7.68555
128.1	1.0205	6.14262	3.02248	7.19725
128.2	1.5088	4.67772	3.99898	9.63865
128.3	1.0205	5.16602	3.02248	8.17385
128.4	1.0205	6.14262	1.55758	6.70895
128.5	2.4853	4.18942	2.53418	7.68555
128.6	1.0205	4.18942	3.51078	8.66215
128.7	1.9971	8.09572	3.51078	8.66215
128.8	1.5088	6.63082	3.02248	8.66215
128.9	1.5088	4.18942	1.55758	8.66215
129	1.5088	4.67772	3.51078	8.17385
129.1	3.4619	6.14262	5.46388	7.68555
129.2	1.9971	5.65432	4.97558	7.19725
129.3	1.5088	4.18942	2.53418	7.68555
129.4	1.0205	6.14262	2.04588	8.17385
129.5	1.5088	5.65432	1.55758	8.17385
129.6	1.5088	3.21292	1.55758	7.68555
129.7	2.9736	3.70122	2.04588	7.19725
129.8	1.9971	5.65432	2.04588	7.19725
129.9	1.5088	6.63082	2.53418	7.68555
130	1.9971	6.63082	3.02248	7.68555
130.1	2.4853	5.65432	2.53418	8.17385
130.2	1.9971	5.16602	3.02248	7.68555
130.3	1.5088	4.67772	3.99898	7.68555
130.4	1.9971	4.18942	3.99898	8.66215
130.5	1.0205	5.65432	3.99898	9.15035
130.6	1.5088	5.16602	3.51078	8.66215
130.7	2.4853	5.16602	1.55758	8.17385
130.8	2.4853	7.11912	0.092782	9.15035
130.9	2.4853	7.60742	2.53418	9.15035
131	2.9736	5.65432	2.53418	9.15035
131.1	3.4619	4.67772	2.53418	9.63865
131.2	2.9736	6.63082	3.51078	8.66215
131.3	2.4853	6.14262	3.99898	7.68555
131.4	1.0205	6.14262	1.06938	6.70895
131.5	1.5088	5.65432	1.06938	6.70895
131.6	1.0205	6.14262	1.06938	6.22075
131.7	2.4853	4.67772	2.04588	5.73245
131.8	3.4619	4.67772	2.04588	6.70895
131.9	2.9736	5.65432	2.04588	7.68555
132	1.0205	6.14262	2.04588	8.17385
132.1	0.532203	6.63082	3.02248	7.19725
132.2	1.5088	6.14262	3.02248	6.70895
132.3	2.4853	4.18942	3.02248	7.68555
132.4	2.4853	3.70122	3.02248	6.70895
132.5	1.9971	4.67772	3.51078	7.68555
132.6	1.5088	5.65432	3.51078	7.68555
132.7	1.9971	5.65432	3.02248	8.17385
132.8	1.9971	6.63082	2.04588	7.68555
132.9	1.5088	6.63082	3.02248	6.70895
133	1.5088	3.70122	3.51078	6.70895
133.1	0.532203	5.16602	3.99898	9.15035
133.2	2.4853	5.16602	3.02248	8.66215
133.3	2.9736	5.65432	2.04588	6.22075
133.4	1.0205	6.63082	2.04588	6.70895
133.5	1.5088	6.14262	2.04588	8.66215
133.6	1.9971	4.67772	2.53418	7.68555
133.7	1.0205	5.16602	2.53418	8.17385
133.8	1.9971	4.18942	3.99898	7.19725
133.9	1.5088	4.18942	3.51078	7.19725
134	1.5088	3.70122	4.48728	7.19725
134.1	1.0205	3.70122	3.99898	7.19725
134.2	1.0205	3.70122	2.53418	7.68555
134.3	2.4853	4.18942	2.04588	5.73245
134.4	1.5088	5.16602	3.02248	6.22075
134.5	1.0205	6.14262	1.55758	7.19725
134.6	2.4853	3.21292	1.55758	8.17385
134.7	2.9736	4.18942	3.02248	8.17385
134.8	2.4853	6.63082	3.99898	7.68555
134.9	0.532203	5.65432	3.51078	7.19725
135	1.5088	4.18942	2.53418	6.70895
135.1	2.4853	4.67772	5.46388	7.68555
135.2	0.043903	6.63082	4.48728	6.22075
135.3	1.0205	4.18942	3.02248	5.24415
135.4	2.4853	2.72462	2.04588	6.70895
135.5	2.9736	3.21292	1.55758	6.70895
135.6	2.4853	4.67772	2.04588	7.68555
135.7	2.4853	3.21292	3.02248	7.19725
135.8	1.5088	2.23632	2.53418	7.19725
135.9	0.532203	2.23632	0.581082	8.66215
136	1.5088	0.771521	1.06938	7.19725
136.1	1.0205	0.283221	2.53418	8.17385
136.2	0.532203	-0.693379	2.53418	8.17385
136.3	1.9971	-1.66988	2.04588	8.66215
136.4	3.9502	-1.18168	1.06938	9.15035
136.5	2.4853	0.283221	2.04588	10.1269
136.6	1.0205	0.283221	2.04588	8.17385
136.7	1.5088	0.771521	1.06938	8.66215
136.8	1.0205	-3.13478	1.55758	8.17385
136.9	1.0205	-5.08788	2.04588	6.22075
137	1.9971	-3.62308	3.02248	7.19725
137.1	1.0205	-5.57618	2.04588	8.17385
137.2	0.043903	-6.55278	2.53418	8.66215
137.3	1.0205	-4.59958	3.51078	7.68555
137.4	2.4853	-5.57618	2.04588	7.19725
137.5	2.4853	-4.59958	1.55758	6.22075
137.6	0.532203	-5.57618	-0.395518	6.22075
137.7	1.0205	-5.57618	-1.37212	7.19725
137.8	1.9971	-6.55278	1.06938	8.17385
137.9	2.4853	-6.55278	-0.395518	8.17385
138	1.0205	-8.01758	-2.34862	7.19725
138.1	1.9971	-6.55278	-3.32522	8.17385
138.2	1.0205	-6.55278	-4.79002	6.70895
138.3	1.5088	-6.55278	-4.79002	8.17385
138.4	3.4619	-6.55278	-5.27832	6.22075
138.5	3.4619	-6.55278	-5.76662	6.22075
138.6	1.9971	-4.59958	-6.74312	7.68555
138.7	1.0205	-4.59958	-6.74312	7.19725
138.8	1.9971	-4.59958	-6.25492	7.68555
138.9	2.9736	-6.55278	-8.20802	6.22075
139	2.4853	-5.57618	-8.69632	7.19725
139.1	1.9971	-6.06448	-8.69632	8.17385
139.2	0.043903	-6.06448	-7.71972	6.70895
139.3	0.043903	-6.55278	-7.23142	7.19725
139.4	1.5088	-5.08788	-8.69632	7.68555
139.5	1.9971	-5.08788	-10.1611	7.68555
139.6	2.4853	-6.06448	-11.626	7.19725
139.7	1.0205	-4.59958	-11.1377	7.19725
139.8	1.5088	-4.59958	-10.6494	8.17385
139.9	1.0205	-5.08788	-9.18452	7.68555
140	1.5088	-3.62308	-10.6494	7.19725
140.1	1.0205	-5.57618	-8.69632	7.19725
140.2	-0.444297	-4.11138	-9.67282	7.68555
140.3	-0.932597	-5.08788	-9.18452	7.19725
140.4	1.0205	-4.11138	-10.6494	6.70895
140.5	1.5088	-2.64648	-10.6494	7.68555
140.6	1.5088	-3.13478	-10.6494	6.70895
140.7	2.4853	-4.59958	-11.626	7.19725
140.8	1.9971	-3.13478	-11.626	6.22075
140.9	1.5088	-3.13478	-8.69632	7.68555
141	1.5088	-3.13478	-7.71972	8.17385
141.1	0.043903	-4.11138	-10.1611	7.19725
141.2	0.532203	-3.62308	-10.1611	7.68555
141.3	1.5088	-3.13478	-11.1377	7.19725
141.4	2.9736	-2.15818	-11.626	6.22075
141.5	1.9971	-1.66988	-11.1377	6.70895
141.6	2.4853	-2.15818	-10.1611	5.73245
141.7	1.9971	-1.66988	-10.1611	7.19725
141.8	2.4853	-1.66988	-11.626	7.68555
141.9	1.5088	-0.205079	-11.626	6.22075
142	0.532203	-1.18168	-10.1611	7.68555
142.1	0.532203	-2.15818	-10.6494	7.68555
142.2	1.5088	-2.64648	-9.67282	7.68555
142.3	0.532203	-2.15818	-7.71972	6.70895
142.4	1.0205	-2.15818	-7.71972	7.68555
142.5	1.0205	-1.18168	-8.69632	7.68555
142.6	1.0205	-0.693379	-9.67282	6.22075
142.7	0.532203	-0.205079	-9.67282	8.66215
142.8	1.0205	-0.693379	-9.67282	8.17385
142.9	0.043903	-0.205079	-11.1377	8.66215
143	-0.444297	-0.693379	-10.6494	6.22075
143.1	0.532203	-0.205079	-10.1611	5.73245
143.2	-0.932597	-0.205079	-9.67282	5.73245
143.3	-1.4209	-0.205079	-10.1611	6.70895
143.4	-0.932597	0.283221	-10.1611	7.19725
143.5	-1.9092	0.283221	-11.1377	7.68555
143.6	-2.8858	-1.66988	-10.1611	8.66215
143.7	-3.374	-0.693379	-8.69632	7.68555
143.8	-3.8623	-0.205079	-8.69632	6.70895
143.9	-2.3975	0.283221	-8.69632	7.68555
144	-2.8858	-0.205079	-9.18452	8.17385
144.1	-3.374	-0.693379	-8.69632	6.70895
144.2	-2.8858	1.25972	-8.20802	7.19725
144.3	-2.3975	1.25972	-7.71972	7.19725
144.4	-2.8858	-0.205079	-7.71972	7.19725
144.5	-4.8389	-0.205079	-8.69632	7.68555
144.6	-3.374	0.283221	-9.18452	8.66215
144.7	-2.8858	-0.205079	-8.20802	6.70895
144.8	-4.3506	1.74802	-7.71972	6.22075
144.9	-3.8623	1.74802	-8.20802	6.70895
145	-2.3975	-0.693379	-7.71972	8.66215
145.1	-4.3506	-1.18168	-7.23142	7.68555
145.2	-3.374	-1.18168	-8.69632	7.68555
145.3	-4.3506	-0.693379	-7.71972	8.17385
145.4	-4.3506	0.283221	-6.74312	6.70895
145.5	-3.374	-0.693379	-6.25492	6.22075
145.6	-2.8858	1.25972	-5.76662	7.68555
145.7	-2.8858	0.771521	-6.74312	7.68555
145.8	-2.8858	1.74802	-7.71972	7.68555
145.9	-2.8858	1.25972	-7.71972	6.70895
146	-4.3506	1.74802	-7.71972	6.70895
146.1	-1.9092	1.25972	-6.74312	6.70895
146.2	-3.374	1.25972	-4.30172	6.22075
146.3	-2.8858	2.23632	-3.81352	5.73245
146.4	-2.8858	1.25972	-5.76662	6.22075
146.5	-3.374	0.771521	-5.76662	8.66215
146.6	-3.374	-0.693379	-5.27832	9.15035
146.7	-2.3975	-0.693379	-4.79002	8.17385
146.8	-2.3975	0.771521	-6.25492	7.19725
146.9	-3.8623	2.72462	-5.27832	6.70895
147	-3.374	3.70122	-6.74312	7.19725
147.1	-2.8858	2.23632	-6.74312	7.68555
147.2	-4.3506	1.25972	-6.74312	7.68555
147.3	-7.7686	2.23632	-5.76662	7.19725
147.4	-6.792	1.25972	-3.81352	6.70895
147.5	-4.8389	0.771521	-4.79002	6.22075
147.6	-3.374	0.771521	-4.79002	7.19725
147.7	-4.3506	0.771521	-4.30172	7.19725
147.8	-5.3272	0.771521	-5.27832	5.73245
147.9	-4.8389	1.25972	-6.25492	6.70895
148	-5.8154	1.25972	-6.25492	8.66215
148.1	-5.3272	0.771521	-5.27832	7.19725
148.2	-4.8389	3.21292	-3.81352	6.70895
148.3	-6.3037	1.74802	-3.32522	6.22075
148.4	-3.374	0.771521	-4.79002	4.75585
148.5	-4.3506	0.283221	-5.27832	5.24415
148.6	-4.3506	-0.693379	-3.81352	6.22075
148.7	-4.8389	0.771521	-4.30172	6.22075
148.8	-5.3272	1.74802	-4.79002	6.22075
148.9	-3.8623	1.74802	-3.81352	7.19725
149	-4.8389	1.74802	-3.81352	6.70895
149.1	-3.8623	2.72462	-5.27832	6.70895
149.2	-2.8858	2.72462	-5.27832	7.19725
149.3	-2.8858	1.25972	-2.83692	7.19725
149.4	-3.8623	1.25972	-3.32522	8.66215
149.5	-5.3272	2.23632	-3.32522	6.22075
149.6	-4.8389	2.23632	-3.81352	6.70895
149.7	-4.8389	1.25972	-3.32522	8.66215
149.8	-1.9092	-0.205079	-2.83692	8.17385
149.9	-3.374	-1.18168	-3.32522	6.22075
150	-2.8858	0.283221	-3.81352	6.70895
150.1	-3.8623	0.283221	-3.32522	6.22075
150.2	-2.3975	-0.205079	-2.83692	5.73245
150.3	-2.3975	2.72462	-2.83692	6.70895
150.4	-3.374	1.74802	-2.83692	8.17385
150.5	-1.4209	2.23632	-4.79002	8.17385
150.6	-2.8858	2.72462	-4.79002	8.66215
150.7	-2.8858	0.771521	-2.34862	7.68555
150.8	-1.9092	1.74802	-3.32522	7.19725
150.9	-2.3975	1.25972	-3.81352	6.22075
151	-2.8858	3.21292	-2.34862	6.22075
151.1	-2.8858	3.70122	-0.883818	4.26755
151.2	-3.8623	2.23632	0.092782	4.75585
151.3	-2.3975	1.74802	-1.86032	5.73245
151.4	0.532203	0.771521	-1.86032	6.70895
151.5	0.043903	1.25972	-0.395518	6.22075
151.6	-0.444297	1.74802	0.581082	7.68555
151.7	-1.9092	1.74802	-1.86032	5.24415
151.8	-2.8858	1.74802	-0.883818	4.26755
151.9	-2.3975	1.74802	-1.37212	6.70895
152	-2.3975	1.74802	-2.34862	6.70895
152.1	-1.9092	1.74802	0.092782	6.22075
152.2	-1.9092	1.74802	-1.86032	6.22075
152.3	-1.4209	0.771521	-2.34862	5.24415
152.4	-1.9092	3.21292	-0.883818	5.73245
152.5	-1.9092	3.70122	-1.86032	5.73245
152.6	-1.9092	2.72462	-1.37212	5.24415
152.7	0.532203	2.23632	-1.37212	5.24415
152.8	-1.9092	0.283221	-1.86032	5.73245
152.9	-1.4209	3.21292	-1.86032	5.24415
153	-2.3975	2.72462	-1.86032	5.24415
153.1	-2.8858	3.70122	-0.883818	5.24415
153.2	-0.444297	3.70122	-0.395518	4.26755
153.3	-3.374	2.72462	-0.395518	6.22075
153.4	-1.4209	0.283221	-0.395518	4.75585
153.5	0.532203	0.771521	-0.395518	4.26755
153.6	0.043903	0.283221	-0.883818	5.24415
153.7	-0.932597	0.283221	-0.395518	5.73245
153.8	-0.444297	0.283221	-0.395518	6.70895
153.9	0.043903	1.74802	-2.34862	4.75585
154	0.532203	3.21292	-1.37212	6.22075
154.1	1.0205	1.74802	-0.395518	6.22075
154.2	0.043903	1.74802	-0.883818	5.24415
154.3	1.0205	2.23632	-2.34862	5.73245
154.4	-0.932597	2.72462	-1.37212	5.24415
154.5	-0.932597	1.25972	1.55758	5.24415
154.6	-0.444297	2.23632	1.06938	5.73245
154.7	0.043903	1.25972	1.55758	6.22075
154.8	-0.932597	1.74802	0.581082	5.73245
154.9	-0.932597	2.72462	0.092782	4.75585
155	0.532203	2.72462	0.092782	4.26755
155.1	-0.932597	2.23632	-0.883818	5.73245
155.2	-1.4209	3.21292	-0.395518	5.73245
155.3	-0.932597	3.21292	-0.395518	4.26755
155.4	-1.4209	3.21292	1.55758	4.26755
155.5	-0.932597	3.70122	0.581082	4.75585
155.6	0.043903	3.21292	-0.395518	5.24415
155.7	1.0205	2.23632	1.06938	5.24415
155.8	-0.932597	3.21292	1.06938	4.75585
155.9	0.532203	3.21292	0.092782	5.24415
156	-0.932597	1.74802	0.092782	3.29105
156.1	-0.444297	1.25972	0.581082	3.77925
156.2	0.043903	3.70122	0.092782	5.73245
156.3	-0.444297	2.23632	-0.395518	5.24415
156.4	0.043903	4.18942	-0.883818	4.75585
156.5	0.043903	3.21292	-0.395518	4.26755
156.6	0.043903	2.23632	1.55758	4.26755
156.7	1.5088	2.72462	1.06938	4.26755
156.8	1.0205	2.23632	0.092782	4.26755
156.9	-0.444297	2.72462	0.092782	4.75585
157	0.043903	3.70122	0.092782	6.22075
157.1	1.0205	3.21292	-0.883818	7.19725
157.2	1.0205	3.70122	0.092782	6.70895
157.3	1.9971	0.771521	-0.395518	4.26755
157.4	1.0205	2.23632	-0.883818	2.31445
157.5	1.5088	4.67772	-0.883818	2.80275
157.6	0.532203	4.18942	-0.395518	4.26755
157.7	0.043903	2.72462	0.581082	4.26755
157.8	0.532203	1.25972	0.581082	4.26755
157.9	1.5088	2.72462	-0.883818	5.73245
158	0.532203	1.74802	-1.86032	4.75585
158.1	-1.4209	2.23632	-1.86032	5.73245
158.2	0.043903	2.72462	-0.883818	6.22075
158.3	0.532203	2.72462	-0.395518	4.75585
158.4	0.532203	2.23632	0.581082	5.24415
158.5	0.043903	0.771521	-0.395518	6.22075
158.6	1.0205	3.70122	-1.37212	6.70895
158.7	1.5088	4.67772	-0.395518	4.75585
158.8	-0.444297	3.70122	0.581082	4.75585
158.9	-0.932597	2.23632	-0.883818	5.24415
159	-0.932597	2.72462	-0.395518	6.70895
159.1	1.5088	4.18942	0.581082	7.68555
159.2	1.0205	3.21292	0.581082	5.73245
159.3	0.043903	2.72462	-0.883818	4.75585
159.4	0.043903	1.25972	-1.86032	5.73245
159.5	1.0205	2.72462	0.581082	5.24415
159.6	0.532203	3.70122	1.06938	5.24415
159.7	-1.9092	4.18942	1.55758	4.26755
159.8	0.043903	3.21292	0.581082	5.24415
159.9	1.0205	3.21292	0.581082	5.24415
160	0.532203	3.21292	1.55758	6.70895
160.1	0.043903	2.23632	0.581082	6.70895
160.2	-0.444297	0.771521	0.581082	6.22075
160.3	0.043903	2.23632	-0.395518	4.75585
160.4	-0.444297	2.23632	-0.395518	5.73245
160.5	-0.932597	2.23632	0.092782	5.73245
160.6	0.043903	1.74802	0.581082	5.24415
160.7	1.5088	1.74802	1.06938	5.73245
160.8	2.9736	2.72462	1.55758	6.70895
160.9	1.0205	2.72462	1.06938	6.70895
161	1.0205	2.23632	-0.395518	5.73245
161.1	2.4853	4.18942	0.581082	5.24415
161.2	2.4853	3.70122	0.581082	6.22075
161.3	1.9971	3.70122	-0.395518	5.73245
161.4	1.9971	4.18942	-0.883818	6.22075
161.5	1.5088	4.67772	-1.86032	5.73245
161.6	1.5088	5.16602	-0.883818	4.75585
161.7	1.0205	2.72462	0.092782	4.26755
161.8	1.0205	0.771521	1.06938	5.24415
161.9	1.5088	1.74802	0.581082	6.22075
162	1.0205	3.70122	-0.395518	5.24415
162.1	1.5088	3.21292	0.092782	5.24415
162.2	1.9971	2.72462	0.092782	4.75585
162.3	1.5088	2.23632	0.581082	5.73245
162.4	1.9971	2.23632	0.092782	5.24415
162.5	-1.4209	2.72462	0.092782	5.73245
162.6	-1.4209	2.72462	0.092782	5.24415
162.7	-0.932597	3.21292	0.581082	5.73245
162.8	0.532203	3.21292	0.581082	5.24415
162.9	0.532203	3.21292	0.092782	5.24415
163	1.9971	2.72462	0.092782	5.24415
163.1	1.0205	2.72462	0.581082	3.77925
163.2	-0.444297	3.21292	1.55758	5.24415
163.3	0.532203	1.74802	1.55758	4.75585
163.4	0.043903	2.72462	0.092782	4.75585
163.5	0.532203	5.16602	-2.34862	4.26755
163.6	1.0205	4.18942	-1.86032	5.24415
163.7	0.043903	1.74802	-0.883818	4.75585
163.8	1.9971	3.70122	-0.395518	5.73245
163.9	0.532203	3.21292	1.06938	5.73245
164	-0.444297	2.72462	0.581082	4.75585
164.1	1.5088	2.72462	0.581082	5.24415
164.2	1.9971	1.74802	0.581082	5.73245
164.3	1.0205	1.74802	-0.395518	7.68555
164.4	1.5088	2.72462	-0.395518	7.68555
164.5	1.5088	2.72462	0.092782	5.24415
164.6	1.9971	4.18942	0.092782	4.75585
164.7	0.532203	1.25972	0.092782	4.75585
164.8	-0.932597	3.21292	1.06938	6.22075
164.9	1.5088	5.16602	1.06938	6.70895
165	1.5088	2.72462	1.55758	6.22075
165.1	1.5088	1.74802	0.092782	7.19725
165.2	1.9971	2.23632	0.092782	7.68555
165.3	1.9971	2.72462	1.06938	6.70895
165.4	2.4853	4.67772	1.55758	6.22075
165.5	1.0205	4.18942	1.06938	6.22075
165.6	1.9971	2.72462	2.04588	5.24415
165.7	1.9971	2.72462	0.092782	6.22075
165.8	0.532203	3.21292	-0.395518	5.73245
165.9	1.5088	2.23632	-1.37212	5.73245
166	0.532203	2.72462	0.092782	5.24415
166.1	1.0205	1.25972	0.581082	6.22075
166.2	2.4853	2.23632	-0.395518	5.24415
166.3	1.5088	3.70122	0.092782	5.24415
166.4	-1.9092	5.16602	2.04588	6.22075
166.5	0.043903	3.70122	0.092782	6.22075
166.6	0.532203	2.72462	0.092782	5.24415
166.7	1.9971	4.67772	0.581082	6.22075
166.8	1.5088	4.18942	1.55758	5.73245
166.9	0.532203	3.70122	1.06938	5.73245
167	0.043903	0.771521	0.581082	4.75585
167.1	1.5088	1.74802	1.06938	5.24415
167.2	1.9971	1.74802	0.092782	5.24415
167.3	1.5088	1.25972	1.06938	5.73245
167.4	1.0205	1.74802	2.04588	6.22075
167.5	0.532203	3.21292	1.06938	6.70895
167.6	1.0205	2.23632	1.06938	7.19725
167.7	1.5088	3.21292	1.06938	5.73245
167.8	1.9971	3.70122	1.06938	6.70895
167.9	1.0205	3.21292	0.581082	5.24415
168	1.9971	3.21292	1.06938	4.26755
168.1	0.532203	4.18942	1.55758	4.26755
168.2	0.532203	4.18942	1.06938	3.77925
168.3	1.0205	1.25972	0.581082	5.73245
168.4	2.9736	1.25972	-0.395518	5.73245
168.5	1.5088	2.23632	1.06938	6.22075
168.6	0.043903	2.72462	1.06938	6.70895
168.7	0.532203	2.23632	1.55758	6.22075
168.8	1.0205	3.70122	2.04588	5.24415
168.9	0.532203	3.21292	2.04588	4.75585
169	1.0205	3.70122	2.53418	4.26755
169.1	1.5088	4.18942	1.06938	5.24415
169.2	1.9971	4.67772	0.581082	5.73245
169.3	1.9971	3.21292	0.581082	5.24415
169.4	1.5088	2.23632	0.581082	4.75585
169.5	1.9971	2.23632	0.581082	5.73245
169.6	1.5088	1.25972	0.581082	5.73245
169.7	0.043903	3.21292	0.581082	3.29105
169.8	1.0205	2.72462	0.581082	5.24415
169.9	1.5088	1.25972	1.55758	6.22075
170	-0.444297	1.74802	2.04588	6.22075
170.1	1.0205	3.70122	1.06938	7.19725
170.2	-0.932597	2.72462	0.581082	6.70895
170.3	-1.4209	4.18942	-0.395518	5.24415
170.4	0.532203	4.67772	0.581082	6.22075
170.5	1.0205	3.21292	0.581082	7.19725
170.6	-0.932597	2.72462	-0.883818	6.22075
170.7	-1.4209	3.21292	-0.395518	5.24415
170.8	0.532203	3.21292	0.092782	5.24415
170.9	1.5088	1.74802	1.55758	5.24415
171	0.532203	2.72462	1.55758	5.73245
171.1	0.043903	2.72462	2.53418	7.68555
171.2	0.532203	2.72462	1.55758	6.22075
171.3	1.0205	3.21292	1.06938	5.73245
171.4	1.5088	1.74802	2.04588	7.68555
171.5	0.043903	3.70122	1.55758	7.19725
171.6	-0.932597	3.70122	0.581082	4.75585
171.7	0.043903	2.23632	1.55758	5.73245
171.8	-1.4209	1.74802	2.53418	6.22075
171.9	0.532203	2.72462	2.04588	6.70895
172	0.532203	3.21292	1.55758	7.19725
172.1	-0.444297	3.21292	-0.395518	7.19725
172.2	1.0205	2.72462	-0.395518	6.22075
172.3	1.5088	2.72462	0.092782	6.22075
172.4	1.0205	4.18942	1.06938	6.22075
172.5	0.532203	5.65432	1.55758	6.22075
172.6	0.532203	3.21292	1.55758	7.68555
172.7	2.4853	2.23632	0.581082	6.70895
172.8	1.5088	3.21292	2.04588	6.70895
172.9	1.0205	4.18942	2.04588	6.70895
173	0.532203	1.74802	0.581082	6.22075
173.1	-0.932597	1.25972	0.092782	7.19725
173.2	-1.4209	1.25972	-0.395518	6.70895
173.3	0.043903	2.23632	0.092782	6.22075
173.4	0.043903	4.18942	0.581082	5.24415
173.5	0.043903	4.18942	1.55758	4.75585
173.6	1.5088	4.18942	1.55758	4.75585
173.7	-0.444297	3.70122	1.06938	4.26755
173.8	-0.444297	2.72462	0.581082	5.24415
173.9	0.043903	2.23632	0.092782	5.24415
174	-0.932597	3.70122	0.092782	4.75585
174.1	-0.444297	5.16602	0.092782	4.75585
174.2	0.043903	4.18942	0.581082	5.73245
174.3	0.043903	3.70122	0.092782	5.73245
174.4	1.0205	4.18942	1.06938	6.70895
174.5	-0.444297	5.16602	1.55758	8.17385
174.6	0.532203	2.72462	1.06938	8.17385
174.7	1.9971	3.21292	-0.395518	7.19725
174.8	1.0205	3.70122	1.55758	6.22075
174.9	1.0205	3.70122	2.53418	6.70895
175	1.0205	3.21292	2.53418	7.68555
175.1	-0.932597	2.72462	1.06938	6.70895
175.2	0.532203	2.23632	0.581082	7.19725
175.3	-0.444297	3.70122	2.53418	6.70895
175.4	-0.444297	4.67772	2.04588	5.73245
175.5	0.043903	1.74802	0.092782	5.73245
175.6	-1.4209	2.23632	1.06938	6.22075
175.7	1.5088	3.21292	2.04588	6.22075
175.8	1.9971	3.70122	2.53418	7.19725
175.9	0.532203	3.21292	2.04588	5.24415
176	1.0205	2.72462	1.55758	5.24415
176.1	1.9971	3.70122	1.06938	6.70895
176.2	1.9971	1.74802	0.092782	6.70895
176.3	1.5088	2.72462	1.06938	6.70895
176.4	2.9736	3.21292	0.581082	6.22075
176.5	1.9971	4.67772	-0.395518	5.24415
176.6	0.532203	5.16602	0.581082	5.73245
176.7	0.532203	4.18942	0.092782	4.75585
176.8	1.0205	3.21292	-0.883818	5.24415
176.9	1.5088	2.23632	-0.395518	7.19725
177	1.0205	2.23632	1.06938	8.17385
177.1	0.043903	2.23632	1.55758	7.19725
177.2	0.532203	3.21292	2.53418	6.70895
177.3	1.0205	1.25972	0.092782	6.70895
177.4	0.532203	1.25972	-0.883818	6.70895
177.5	0.532203	2.23632	0.581082	7.68555
177.6	0.532203	2.23632	1.55758	8.66215
177.7	-0.444297	2.23632	1.06938	6.22075
177.8	0.532203	3.70122	2.04588	5.24415
177.9	1.0205	4.67772	2.53418	5.73245
178	1.0205	4.67772	3.02248	5.73245
178.1	-0.444297	3.70122	1.06938	6.70895
178.2	-0.444297	3.21292	-0.395518	8.17385
178.3	1.0205	3.21292	0.581082	7.68555
178.4	1.9971	3.70122	1.06938	7.19725
178.5	1.5088	3.21292	1.55758	6.70895
178.6	0.043903	3.70122	0.581082	5.24415
178.7	1.0205	3.70122	1.06938	4.75585
178.8	0.532203	3.70122	2.04588	7.19725
178.9	1.5088	3.70122	0.092782	6.22075
179	-0.444297	5.65432	-0.395518	6.70895
179.1	0.043903	4.67772	-0.395518	6.22075
179.2	-0.932597	4.18942	0.092782	6.70895
179.3	1.0205	3.21292	0.581082	6.70895
179.4	0.532203	2.23632	0.581082	6.70895
179.5	0.043903	3.21292	1.06938	6.70895
179.6	-0.444297	4.18942	0.581082	6.70895
179.7	0.043903	5.16602	0.092782	6.70895
179.8	0.043903	4.18942	1.55758	6.70895
179.9	1.0205	3.70122	0.581082	5.24415
180	0.532203	3.21292	0.581082	5.24415
180.1	0.043903	4.67772	1.55758	6.70895
180.2	0.532203	4.67772	1.06938	6.70895
180.3	-0.932597	3.21292	-0.395518	6.70895
180.4	0.532203	2.23632	0.581082	6.22075
180.5	0.043903	2.23632	0.581082	4.75585
180.6	-0.932597	2.72462	-0.883818	4.75585
180.7	-4.3506	4.18942	-0.883818	6.22075
180.8	-4.3506	4.18942	-0.883818	6.70895
180.9	-5.3272	3.70122	0.581082	7.19725
181	-4.3506	3.70122	0.092782	9.15035
181.1	-5.3272	4.18942	1.06938	7.19725
181.2	-5.3272	2.72462	1.55758	4.75585
181.3	-5.8154	2.72462	1.06938	5.73245
181.4	-5.8154	2.72462	0.092782	7.19725
181.5	-7.2803	4.67772	1.55758	5.24415
181.6	-9.2334	3.21292	-0.395518	4.26755
181.7	-9.7217	2.72462	0.581082	5.24415
181.8	-9.2334	2.23632	1.06938	5.73245
181.9	-8.2569	2.72462	1.55758	5.73245
182	-8.2569	3.21292	2.04588	5.73245
182.1	-8.7451	3.21292	1.55758	6.70895
182.2	-8.7451	3.21292	0.581082	7.68555
182.3	-7.7686	3.70122	0.581082	7.68555
182.4	-7.7686	4.67772	2.04588	7.19725
182.5	-8.7451	5.65432	2.53418	6.22075
182.6	-7.7686	5.65432	1.55758	5.73245
182.7	-8.2569	2.23632	0.092782	6.70895
182.8	-7.7686	2.23632	0.581082	6.22075
182.9	-7.7686	2.72462	1.06938	5.24415
183	-7.7686	3.21292	0.581082	6.22075
183.1	-10.21	3.70122	1.06938	6.70895
183.2	-9.7217	3.21292	1.06938	5.24415
183.3	-7.7686	3.21292	0.092782	5.24415
183.4	-7.7686	4.18942	1.55758	5.73245
183.5	-9.2334	1.74802	1.55758	6.70895
183.6	-10.21	2.23632	0.092782	7.19725
183.7	-8.7451	3.21292	1.06938	5.73245
183.8	-8.2569	3.70122	1.55758	5.73245
183.9	-9.2334	3.21292	0.581082	7.19725
184	-9.2334	3.70122	0.581082	5.24415
184.1	-8.7451	3.21292	1.55758	4.75585
184.2	-8.2569	4.18942	1.06938	6.22075
184.3	-9.2334	4.18942	0.092782	6.70895
184.4	-9.7217	2.72462	1.55758	6.70895
184.5	-8.7451	1.25972	2.53418	7.19725
184.6	-7.2803	1.74802	2.04588	4.75585
184.7	-7.7686	4.67772	0.092782	6.22075
184.8	-9.2334	4.67772	0.092782	6.22075
184.9	-8.2569	4.67772	0.581082	7.19725
185	-8.7451	2.23632	-0.395518	6.22075
185.1	-7.7686	2.23632	1.06938	6.22075
185.2	-9.2334	4.18942	2.53418	7.68555
185.3	-7.2803	4.18942	2.53418	7.68555
185.4	-6.792	3.21292	1.06938	5.73245
185.5	-7.7686	3.21292	2.04588	7.68555
185.6	-6.3037	4.67772	1.55758	7.68555
185.7	-7.7686	3.70122	-0.395518	7.19725
185.8	-7.7686	4.18942	0.092782	5.24415
185.9	-7.2803	3.70122	1.06938	4.26755
186	-5.8154	1.74802	2.53418	5.24415
186.1	-6.3037	3.21292	1.55758	4.26755
186.2	-8.2569	3.21292	0.581082	3.77925
186.3	-7.2803	2.23632	0.092782	6.22075
186.4	-5.3272	2.72462	0.581082	5.73245
186.5	-6.792	4.18942	1.06938	7.68555
186.6	-8.7451	1.25972	1.06938	6.70895
186.7	-8.2569	2.23632	0.092782	6.70895
186.8	-7.7686	4.18942	-1.37212	7.19725
186.9	-4.8389	3.70122	-2.83692	6.70895
187	-7.7686	3.70122	-2.34862	6.22075
187.1	-8.7451	4.67772	-1.37212	5.73245
187.2	-5.3272	3.21292	-0.883818	6.22075
187.3	-6.3037	3.21292	-3.81352	6.22075
187.4	-5.3272	2.72462	-4.79002	6.22075
187.5	-6.3037	-0.693379	-4.30172	6.22075
187.6	-8.2569	0.283221	-2.83692	6.22075
187.7	-8.2569	2.23632	-1.86032	5.73245
187.8	-6.3037	3.70122	-2.34862	6.70895
187.9	-6.792	3.70122	-2.83692	5.24415
188	-8.2569	3.70122	-4.79002	5.24415
188.1	-5.8154	2.23632	-3.81352	7.19725
188.2	-6.3037	2.72462	-3.81352	7.19725
188.3	-5.3272	1.74802	-2.83692	7.19725
188.4	-4.3506	3.70122	-2.83692	5.73245
188.5	-5.8154	5.16602	-1.86032	5.73245
188.6	-6.792	3.70122	-1.37212	5.24415
188.7	-5.8154	2.72462	-0.883818	5.73245
188.8	-3.8623	2.72462	-0.883818	5.73245
188.9	-4.8389	1.74802	-1.37212	5.24415
189	-5.8154	2.72462	-3.81352	7.68555
189.1	-5.3272	4.18942	-4.30172	7.68555
189.2	-4.3506	2.23632	-2.34862	5.73245
189.3	-4.3506	1.74802	-2.83692	4.75585
189.4	-3.374	2.23632	-1.86032	5.24415
189.5	-4.8389	3.70122	-1.86032	6.70895
189.6	-5.3272	2.72462	-1.86032	6.22075
189.7	-4.8389	2.72462	-0.883818	4.75585
189.8	-2.3975	3.70122	-0.395518	5.24415
189.9	-4.3506	3.21292	0.092782	6.22075
190	-4.3506	3.70122	-2.83692	7.68555
190.1	-4.3506	4.67772	-2.34862	6.70895
190.2	-3.8623	3.21292	-0.883818	5.73245
190.3	-1.9092	1.74802	-2.83692	4.26755
190.4	-2.8858	3.70122	-1.86032	5.24415
190.5	-4.8389	3.70122	-1.86032	6.22075
190.6	-4.8389	2.72462	-1.86032	5.24415
190.7	-4.3506	1.74802	0.092782	5.24415
190.8	-3.8623	2.72462	0.092782	5.24415
190.9	-4.8389	4.18942	0.581082	5.73245
191	-3.8623	3.70122	0.092782	6.70895
191.1	-4.8389	4.67772	-1.86032	7.19725
191.2	-5.8154	4.18942	-2.34862	6.22075
191.3	-4.3506	1.74802	-1.37212	5.73245
191.4	-1.4209	2.72462	-0.395518	6.70895
191.5	-1.4209	1.25972	0.092782	8.17385
191.6	-2.8858	2.23632	-0.395518	6.70895
191.7	-2.3975	2.23632	0.581082	5.73245
191.8	-3.8623	2.23632	1.06938	5.73245
191.9	-2.3975	3.70122	-0.395518	6.22075
192	-1.4209	3.21292	-0.395518	7.19725
192.1	-2.3975	3.21292	1.06938	6.22075
192.2	-1.9092	3.21292	-0.395518	6.22075
192.3	-0.932597	2.72462	-0.395518	6.70895
192.4	-1.4209	2.72462	0.092782	5.73245
192.5	-2.8858	3.70122	-1.37212	6.22075
192.6	-2.3975	3.70122	-0.883818	6.70895
192.7	-0.932597	2.72462	0.092782	5.73245
192.8	-0.932597	3.21292	-0.395518	6.22075
192.9	-2.3975	3.70122	-0.883818	6.22075
193	-3.374	2.23632	-1.37212	7.68555
193.1	-2.3975	2.23632	0.092782	6.70895
193.2	-1.9092	2.23632	-0.883818	6.22075
193.3	0.043903	2.23632	-0.883818	6.22075
193.4	-1.9092	2.23632	-1.86032	5.73245
193.5	-3.374	2.23632	-0.883818	6.22075
193.6	-1.4209	2.72462	0.092782	5.73245
193.7	-0.932597	1.74802	1.55758	5.24415
193.8	-1.4209	2.23632	1.06938	5.24415
193.9	-1.4209	1.25972	0.092782	6.22075
194	-0.932597	2.23632	0.581082	5.73245
194.1	-1.9092	1.74802	-0.883818	6.22075
194.2	-2.3975	0.771521	-0.395518	5.73245
194.3	-2.8858	3.70122	-0.395518	6.22075
194.4	-1.9092	3.70122	-0.883818	6.22075
194.5	-3.374	2.72462	-0.395518	7.19725
194.6	-2.3975	2.23632	0.092782	6.22075
194.7	-2.8858	1.74802	0.092782	5.24415
194.8	-3.374	3.21292	0.092782	5.24415
194.9	-4.3506	2.72462	1.55758	5.24415
195	-2.3975	3.70122	1.06938	6.22075
195.1	-4.3506	3.70122	0.092782	6.70895
195.2	-5.3272	3.70122	1.06938	5.73245
195.3	-4.8389	3.70122	1.55758	5.24415
195.4	-5.8154	2.72462	1.55758	6.22075
195.5	-5.8154	2.23632	0.581082	6.22075
195.6	-3.8623	1.74802	0.581082	6.70895
195.7	-2.3975	1.74802	-0.395518	6.70895
195.8	-1.9092	1.74802	0.092782	6.70895
195.9	-1.9092	1.25972	1.06938	6.70895
196	-3.374	0.283221	-0.395518	5.73245
196.1	-1.9092	3.21292	-0.395518	5.73245
196.2	-1.4209	3.70122	-1.37212	4.75585
196.3	-3.374	2.72462	-0.883818	5.73245
196.4	-3.8623	2.23632	0.092782	6.70895
196.5	-3.8623	3.70122	0.092782	6.70895
196.6	-5.8154	2.23632	1.06938	5.73245
196.7	-5.8154	1.25972	-0.395518	4.75585
196.8	-2.3975	0.771521	-0.883818	4.75585
196.9	-2.3975	0.771521	0.092782	5.24415
197	-2.8858	1.74802	-0.395518	5.24415
197.1	-3.374	3.70122	0.581082	6.70895
197.2	-2.8858	4.67772	1.55758	7.19725
197.3	-2.3975	3.70122	-0.395518	6.70895
197.4	-2.8858	3.21292	0.092782	5.24415
197.5	-3.374	2.23632	0.581082	5.73245
197.6	-1.9092	2.72462	-0.395518	7.19725
197.7	-0.932597	3.21292	0.092782	7.19725
197.8	-3.374	1.25972	0.581082	5.73245
197.9	-1.9092	1.25972	-0.395518	5.24415
198	-0.444297	2.23632	1.06938	6.70895
198.1	-0.932597	3.21292	1.06938	6.70895
198.2	-0.444297	3.21292	0.581082	6.70895
198.3	0.043903	1.74802	-0.395518	6.70895
198.4	-2.3975	0.771521	0.092782	6.22075
198.5	-3.8623	2.23632	0.581082	6.70895
198.6	-3.374	1.74802	1.06938	6.70895
198.7	-0.932597	2.23632	1.55758	6.22075
198.8	0.043903	3.21292	0.581082	3.77925
198.9	-1.9092	3.21292	0.092782	4.26755
199	-2.3975	3.21292	0.092782	5.24415
199.1	-1.4209	4.18942	0.581082	6.70895
199.2	0.043903	2.72462	0.581082	7.19725
199.3	-0.444297	3.21292	1.06938	5.73245
199.4	-2.3975	2.72462	0.092782	5.73245
199.5	-3.374	1.74802	-0.395518	5.24415
199.6	-1.9092	3.21292	-0.883818	6.70895
[truncated: 13,004 more rows]
