# Supplementary material for: Pull-push neuromodulation of cortical plasticity enables rapid bi-directional shifts in ocular dominance
Source: eLife. 2020 May 20;9:e54455. doi: 10.7554/eLife.54455 (PMC7239653; doi:10.7554/eLife.54455)
Supplement: Figure 4—source data 1. [file elife-54455-fig4-data1.xlsx]

## Sheet: Figure4
Figure 4B
	Contralateral		Ipsilateral		ODI
	Before	After	Before	After	Before	After
Mouse1	3.28	4.246	2.2	1.477	0.205	0.473
Mouse2	3.66	2.88	1.892	1.41	0.324	0.345
Mouse3	2.578	3.36	1.612	1.504	0.229	0.387
Mouse4	3.52	3.11	1.9	1.78	0.305	0.26
Mouse5	3.104	4.237	1.923	1.958	0.247	0.368
Mouse6	3.198	4.174	1.868	1.692	0.268	0.425
Mouse7	2.02	2.48	1.292	1.505	0.227	0.253
Mouse8	3.48	3.012	2.38	1.511	0.2	0.31
Mouse9	3.62	4.11	2.44	1.74	0.2	0.41
Mouse10	3.69	2.81	2.29	1.01	0.22	0.44
Figure 4C
	Contralateral		Ipsilateral		ODI
	Before	After	Before	After	Before	After
Mouse1	3.47	2.14	1.98	1.36	0.28	0.22
Mouse2	3.2	1.88	1.9	1.56	0.25	0.09
Mouse3	2.54	1.29	1.73	1.19	0.18	0.038
Mouse4	2.29	1.87	1.24	1.16	0.26	0.22
Mouse5	3.9	3.35	2.36	2.22	0.228	0.18
Mouse6	2.6	1.256	1.59	1.33	0.246	0.026
Mouse7	2.72	2.98	1.44	1.57	0.309	0.31
Mouse8	3.01	2.81	1.91	1.82	0.22	0.197
Mouse9	2.47	1.97	1.65	1.36	0.203	0.191
Mouse10	2.26	1.99	1.58	0.94	0.18	0.2
Figure 4D
	Contralateral		Ipsilateral		ODI
	Before	After	Before	After	Before	After
Mouse1	3.19	3.32	1.68	1.85	0.289	0.287
Mouse2	3.6	3.11	2.13	1.88	0.246	0.243
Mouse3	1.89	2.34	0.8	0.99	0.357	0.409
Mouse4	2.71	2.33	1.64	1.16	0.245	0.313
Mouse5	3.74	2.49	2.47	1.28	0.2	0.32
Mouse6	4.12	2.64	2.49	2.06	0.247	0.109
Mouse7	4.08	3.49	2.25	1.735	0.292	0.324
Mouse8	3.43	2.93	2.19	1.94	0.213	0.175
Mouse9	3.39	3.03	2.28	2	0.201	0.199
