# Supplementary material for: Pull-push neuromodulation of cortical plasticity enables rapid bi-directional shifts in ocular dominance
Source: eLife. 2020 May 20;9:e54455. doi: 10.7554/eLife.54455 (PMC7239653; doi:10.7554/eLife.54455)
Supplement: Figure 5—source data 1. [file elife-54455-fig5-data1.xlsx]

## Sheet: Figure5
Figure 5A						Figure 5C
	before	after				Juvenile	Adult	Potentiated juvenile
Mouse1	0.307533	0.23881				0.35	0.307533	0.32
Mouse2	0.261057	0.107136				0.25	0.261057	0.46
Mouse3	0.275536	0.232286				0.241	0.275536	0.41
Mouse4	0.396875	0.14761				0.09	0.396875	0.18
Mouse5	0.420637	0.0962238				0.27	0.420637	0.35
Mouse6	0.1919	0.00657				0.31	0.1919	0.49
Mouse7	0.2721	0.1557				0.24	0.2721	0.324
Mouse8	0.2895	0.1028				0.297	0.2895	0.319
Mouse9	0.2697	0.2433				0.195	0.2697	0.2532
						0.2111	0.317
						0.3029	0.397681
Figure 5B						0.303567	0.219569
	before	after				0.246328	0.392342
Mouse1	0.317	0.326				0.289575	0.289902
Mouse2	0.332	0.321				0.219263	0.332
Mouse3	0.259	0.281				0.3645	0.259
Mouse4	0.341	0.352				0.27	0.341
						0.38	0.3395
						0.24
Figure 5G						0.2
	Eye open	Before	After	After1d		0.24
Mouse1	0.026	-0.05	-0.07	NaN		0.3
Mouse2	-0.013	-0.114	-0.015	NaN		0.2566
Mouse3	-0.045	-0.102	0.119	0.01		0.382
Mouse4	0.073	0.132	0.272	0.193		0.222
Mouse5	0.033	0.077	0.104	0.138		0.312
Mouse6	-0.0855	-0.077	0.0768	0.0907		0.19
Mouse7	0.01611	0.049	0.2789	NaN		0.29
						0.28
Figure 5H						0.236
	Before	After				0.225
Mouse1	-0.05	-0.07				0.327
Mouse2	-0.114	-0.015				0.26
Mouse3	-0.102	0.119				0.1635
Mouse4	0.132	0.272				0.3393
Mouse5	0.077	0.104				0.3769
Mouse6	-0.077	0.0768				0.196
Mouse7	0.049	0.2789				0.15555
						0.2777
						0.3152
						0.217
						0.15
						0.24
